# Supplementary material for: Genome-Wide Analysis of the NADK Gene Family in Plants
Source: PubMed Central journal article supplement (PMC4072752; doi:10.1371/journal.pone.0101051), 2014-06-26
Supplement: pone.0101051.s001.pdf [file pone.0101051.s001.pdf]

10 20 30 40 50 60 70 80

Sub. I

Sub. II

Sub. IV

Sub. III

Outgroup

PtNADK4 TVLIMTKPNSTSVRIICA-----EMVRWLKDKHKKLNIIYVEPRVMGEL  
PtNADK1 TVLVMTKPNSTSVQILICA-----EMIRWMKEHKKLNIIYVEPRVMGEL  
CsNADK1 TVLILTKPNSTISVQMICF-----EMVRWLRHKDLHIIYVEPRVKNEL  
VvNADK2 TVLILTKPNSTSVRIICLV-----DMVRWLRQKKMEIFVEPRVKVEL  
AtNADK1 TVLIIITKPNSTSVRVLSV-----DMVRWLRQKGLNIIYVEPRVKEEL  
BrNADK3 NVLIIITKPKSTSVQVLSV-----EMVRWLRQKGLNIIYVEPRVKAEL  
BrNADK4 TVLIIITKPNSTSVRVLSV-----EMVRWLRDHKGLNIIYVEPRVKAEL  
BrNADK1 TVLIIITKPNSTSVRVLSV-----EMVRWLRHKGLNIIYVEPRVKAEL  
SiNADK2 TVLFIITKPNNSVLAALCA-----EMVRWLKEHNNMNIIFVEPRVSKEL  
BdNADK1 TVLFIITKPNNSAVHTLCS-----EMIRWLKEHNNMNIIFVEPRVSKEL  
OsNADK2 TVLFIITKPNNSVHALCA-----EMVRWLKEHNNMNIIFVEPRVSKEL  
SbNADK3 TVLFIITKPNNSVLAALCA-----EMVRWLKEHNNMNIIFVEPRVSKEL  
SiNADK1 TVLFIITKPNNSVHVLCA-----EMVRWLKEHKNINIVVEPRVSKEL  
OsNADK1 TVLFIITKPNNSVHVLCA-----EMVRWLKEHKNINIVVEPRVSKEL  
BdNADK2 TVLFIITKPNNSPVRVLC-----EMVRWLKEHKNINIVVEPRVSKDL  
ZmNADK2 TVLFIITKPNNSVSRVLC-----EMVRWLRREYKVNIVVEPRVSKEL  
ZmNADK3 TVLFIITKPNNSVSRVLC-----EMIRWLKEHKNINIVVEPRVSKEL  
SbNADK1 TVLFIITKPNNSVSRVLC-----EMVRWLRRESKNINIVVEPRVSKEL  
SmNADK2 CVCILITKPNCKRVHDLCK-----EMIVWLHSV-SLSIYVEPRVREEM  
SmNADK3 AVCILITRPNSSAVQELCK-----KMIRWLKEVKNITVVEPRVKDEL  
PpNADK2 SVFIIITKPNAAAVQQLCE-----EMVWVLRQNVTKIYVEPRVKAEL  
PpNADK3 SVFIIITKPNASDVTAICK-----EMIRWLKEEKGIYVVEPRVSKREL  
PpNADK4 TVLIIITKPNNSPTCTALCK-----EMIRWLREEKGVVYVEPRVSKEL  
CrNADK3 AAGVGVSSMDVEEEVE-----EEDLMPGCGSTGVPLLSWPSVGE  
VcNADK3 EGGGGGGGEEAAEEAAEE-----GVLMPGCGYTVPMLLSWPADEG  
PtNADK3 TVLIIITKPKLQELMEEAKE-----VASFLYHQEKNMNVVEPDVHDIF  
PtNADK2 TVLIIITKPKLQELMEEAKE-----VASFLYHQEKNMNVVEPDVHDIF  
BrNADK2 TVLIIITKPKLQELMEEAKE-----AASFVLYHQEKNMNVVEPDVHDVF  
AtNADK2 TVLIIITKPKLQELMEEAKE-----EVHEKLLVVFQICFQAASFVLYHQENMNVVEPDVHDVF  
VvNADK1 TVLIIITKPKLQELMEEAKE-----IASFLYHQEKNMNVVEPDVHDIF  
CsNADK2 TVLIIITKPKLQELMEEAKE-----VALFLYHQEKNMNVVEPDVHDIF  
SiNADK3 TVLIIITKPKLQELMEEAKE-----VASFLHHQEKNMNVVEPDVHDIF  
OsNADK3 TVLIIITKPKLQELMEEAKE-----VASFLHHQEKNMNVVEPDVHDIF  
BdNADK3 TVLIIITKPKLQELMEEAKE-----VASFLHHQEKNMNVVEPDVHDIF  
SbNADK2 TVLIIITKPKLQELMEEAKE-----VASFLHHQEKNMNVVEPDVHDIF  
ZmNADK1 TVLIIITKPKLQELMEEAKE-----VASFLHHQEKNMNVVEPDVHDIF  
SmNADK1 TVLIIITKPKLQELMEEAKE-----VASFLYHNEGMNVVEPDVHDF  
PpNADK1 TVLIIITKPKLQELMEEAKE-----VASFLYHNEGMNVVEPDVHDF  
CrNADK1 SVMVIMKLGDELAPFLD-----VVDFLGREHQLRVVVEPHVYEQQ  
VcNADK2 SVMVIMKLGDELQPFLE-----VIDFLGREHSLRVVVEPHVYDEF  
CvNADK2 (NC64A) RVMVILKLGDELMEEYVD-----VLRYLGEELGMRVVVEPHDHAVL  
CsNADK2 (C-169) CVLVLKLGDELQWDSYLR-----VLRYLGAEEGMRVVVEPHYELKL  
MpNADK2 (CCMP1545) RILVLKLGDPALLPQLVE-----VSHAMLSMGFEVVVEENVVGEMREEKAARDAARRSAAA  
MpNADK1 (RCC299) RIFILKLGDPALLQNLVE-----VAHAMLSMGFQVVVEASVLEEMRIE-----REHAR  
OtNADK1 RYFIITKPKIGHGLPELIE-----VAHAMMTMGRIRVLEDTMDDEL  
OlNADK2 NADILEDTLHRAV-----VLKNAEKLRKVDGIIPQ  
GsNADK1 TCVLILAKKDPALFHQTIL-----AVQYIL-KKQKLVIVESFLQPEI  
CmNADK2 TVLIIITKPKGANLCEIAKQ-----AVDYLQNSERLRLVVEPWQTEL  
GsNADK2 TVLVVRSRGRSQAELALQ-----QLVWVWLKAEQQLVIVENEVAK  
CmNADK1 HIIILFTVYSDSARSASV-----KIQQWL-EAEYPELILYSEHTIL  
MpNADK1 (CCMP1545) NALVVKKPNVDVQTTMMP-----RVVDMILARNDVEAVVEPAVHWET  
MpNADK2 (RCC299) NVLVIKPKDKNTTAMLP-----RVHALLQSKGIRTVVEPVVHWET  
OlNADK1 NALVVKKIHDAAAAEMMI-----RATRVLKSQGVTAWEERAVWDEF  
OtNADK2 NALVVKKIHDEAATKMMR-----RAVKAL-EGQGITSWLBRVWDDA  
VcNADK1 KVLIVKPKPNPAASTKLH-----EIGAWL-RARGTEVFERVVWATE  
CrNADK2 KVLIVKPKPNPAAAALKL-----AIGDWL-TARGIQVFERVVWATE  
CvNADK1 (NC64A) CVLIVKPKPGDAAAQKLK-----EIGSWL-KGHGLQVLEPRVQAQAE  
CsNADK1 (C-169) SVFIVKPKPHSLEASAKMK-----EIGDWL-TSKGLNIVLERSVHKM  
CpNADK1 TLLLVKRRKDDRTTAALD-----KTGWLE-RGRVRLVEETTRCDL  
PtNADK5 RLLLLMLKPFDDVYQFGQSN-----GGSSITNSQAFRYLDNRKRKVKDAVNFQCDIL  
VvNADK3 RLLLLMLKSLDIHPYSQLD-----LLSRITTPRVLYLENNRKHVEDAINFCQDVL  
CsNADK3 RLLLLMLKPFDDANPVLHSD-----AFSRVTTPQILRHLENRQEVHREIDVCKDIL  
BrNADK6 KLLLLMLKPIDPYPFLQSG-----GVSLIKNPQVLKYLESRCKVHRNAINLQCEIL  
BrNADK5 KLLLLMLKPIDPYPFLQSG-----GVSLIKNHQVLYLESRCKVHRNAINLQCEIL  
AtNADK3 KLLLLMLKPIDPYPFLQTE-----GASLIKNPQVLKYLESRCKVHRNAINLQCEIL  
OsNADK4 RVLLFLKPFDDVYPPRPLA-----AAASSPPPPPPPLRVSNPKVLYLDDRCRVHKETINLCKSVL  
BdNADK4 RVLLFLKPFDDVYPPRPLA-----SASSPTTPPPPPPPRAANPKVLSYLDRCRVHKETINLCKSVL  
SiNADK4 RVLLFLKPFDDVYPPRPRYAGAAASSPTSSP-----PSQPRAANPKVLSYLDRCRVHKETINLCKSVL  
ZmNADK4 RVLLFLKPFDDVYPPRPRYVGAASSPTSP-----SASSPQLPRAANPKVLSYLDRCRVHKETINLCKSVL  
SbNADK4 RVLLFLKPFDDVYPPRPRYVGAASSPTSP-----SASSPQLPRAANPKVLSYLDRCRVHKETINLCKSVL  
SmNADK4 RVLLFLKPFDDVYPPRPRYVGAASSPTSP-----SASSPQLPRAANPKVLSYLDRCRVHKETINLCKSVL  
PpNADK5 RVLLFLKPFDDVYPPRPRYVGAASSPTSP-----SASSPQLPRAANPKVLSYLDRCRVHKETINLCKSVL  
MpNADK3 (RCC299) --NRLRERHDTHTMTQVDR-----ITTEWLTAR-----GVDMTSVMRDDA  
AmNADK1 KAGIIYNELKPFACRIAT-----ELKDKLHACGWQVCLATGVGGIL  
PmNADK1 KAGLIVNDGKELAVQTAS-----SVQKLENSNFEVVRVSSSGMV  
EcNADK1 CTGIVGHRPHPTALTTHE-----MLYRWL-CTKGYEVIIVEQIHAEL

Cluster I

Cluster II

|                    | 90                                    | 100                  | 110           | 120                         | 130     | 140   | 150   | 160 |
|--------------------|---------------------------------------|----------------------|---------------|-----------------------------|---------|-------|-------|-----|
| PtNADK4            | -----LSESSYFN                         | FWKD                 | -----EKE-VLS  | -----                       | HTKV    | ----- | ----- | DL  |
| PtNADK1            | -----LSESSYFN                         | QWWD                 | -----EKE-ILS  | -----                       | HTKV    | ----- | ----- | DL  |
| CsNADK1            | -----LTESDYNF                         | QWKS                 | -----DEE-IML  | -----                       | HTKV    | ----- | ----- | DL  |
| VvNADK2            | -----MTESPNF                          | QWWD                 | -----DKE-TLL  | -----                       | HTNV    | ----- | ----- | DL  |
| AtNADK1            | -----LSESSSFNF                        | QWEDVMIYDADKE        | -----ISL      | -----                       | HTKV    | ----- | ----- | DL  |
| BrNADK3            | -----LSESSSFDF                        | QWED                 | -----DKE-ISL  | -----                       | HPKI    | ----- | ----- | DL  |
| BrNADK4            | -----LSESSSFDF                        | QWED                 | -----DKE-ISL  | -----                       | HPKV    | ----- | ----- | DL  |
| BrNADK1            | -----LSESSSFDF                        | QWED                 | -----DKE-ISL  | -----                       | HPKV    | ----- | ----- | DL  |
| SiNADK2            | -----VTEDSYNF                         | QWNN                 | -----DQE-AKT  | -----                       | HTKV    | ----- | ----- | DL  |
| BdNADK1            | -----VTEDSYNF                         | QWWDN                | -----DQE-MKT  | -----                       | HTKV    | ----- | ----- | DL  |
| OsNADK2            | -----VTEDSYNF                         | QWWDN                | -----DEE-MKT  | -----                       | HTKV    | ----- | ----- | DL  |
| SbNADK3            | -----VTEDSYNF                         | QWWDN                | -----DQE-AKT  | -----                       | HTKI    | ----- | ----- | DL  |
| SiNADK1            | -----LTEDSNYN                         | QWWDN                | -----DEE-MKL  | -----                       | HTKV    | ----- | ----- | DL  |
| OsNADK1            | -----LTEDSYNF                         | QWDD                 | -----DEE-KKM  | -----                       | HTKV    | ----- | ----- | DL  |
| BdNADK2            | -----LTEDSSHN                         | QWWDN                | -----DEE-RKV  | -----                       | HKV     | ----- | ----- | DL  |
| ZmNADK2            | -----LTEDSYNF                         | QWWDN                | -----DDD-IKM  | -----                       | HTKV    | ----- | ----- | DL  |
| ZmNADK3            | -----LTEDSYNF                         | QWWDN                | -----DEE-IKM  | -----                       | RTKV    | ----- | ----- | DL  |
| SbNADK1            | -----LTEDSYNF                         | QWWDN                | -----DEE-IKM  | -----                       | HTKV    | ----- | ----- | DL  |
| SmNADK2            | -----LADDSLMT                         | FWDS                 | -----DEE-LCF  | -----                       | HNKI    | ----- | ----- | DL  |
| SmNADK3            | -----DESSDCTY                         | QWWD                 | -----SEELLF   | -----                       | HTKV    | ----- | ----- | DL  |
| PpNADK2            | -----MEENADFE                         | QWCET                | -----EKQ-LVT  | -----                       | NKSV    | ----- | ----- | DL  |
| PpNADK3            | -----LDDSSYFR                         | QACET                | -----EQE-VHE  | -----                       | HTKV    | ----- | ----- | DL  |
| PpNADK4            | -----LAEDYFNC                         | VKSCET               | -----EEE-VLQ  | -----                       | HTKV    | ----- | ----- | DL  |
| CrNADK3            | -----G-DDCRS                          | -----                | QGV-PSDV      | -----                       | AAAV    | ----- | ----- | DF  |
| VcNADK3            | -----DDCHSQV                          | -----                | PGDV          | -----                       | AAAV    | ----- | ----- | DF  |
| PtNADK3            | -----ARIPGF                           | QIFY                 | -----SQD-TSD  | -----                       | HERV    | ----- | ----- | DF  |
| BrNADK2            | -----ARIPGF                           | QIFY                 | -----SQD-TSD  | -----                       | HEMV    | ----- | ----- | DF  |
| BrNADK2            | -----ARIPGF                           | QIFY                 | -----IQD-TSD  | -----                       | HERV    | ----- | ----- | DF  |
| AtNADK2            | -----ARIPGF                           | QIFY                 | -----IQD-TSD  | -----                       | HERV    | ----- | ----- | DF  |
| VvNADK1            | -----ARIPGF                           | QIFY                 | -----SQD-TSD  | -----                       | HERV    | ----- | ----- | DF  |
| CsNADK2            | -----ARIPGF                           | QIFY                 | -----SQD-TSD  | -----                       | HEKV    | ----- | ----- | DF  |
| SiNADK3            | -----ARIPGY                           | QIFY                 | -----TQD-TSD  | -----                       | HERV    | ----- | ----- | DF  |
| OsNADK3            | -----ARIPGY                           | QIFY                 | -----TQD-TSD  | -----                       | HERV    | ----- | ----- | DF  |
| BdNADK3            | -----ARIPGF                           | QIFY                 | -----TQD-TSD  | -----                       | HERV    | ----- | ----- | DF  |
| SbNADK2            | -----ARIPGY                           | QIFY                 | -----SQD-TSD  | -----                       | HERV    | ----- | ----- | DF  |
| ZmNADK1            | -----ARIPGY                           | QIFY                 | -----TQD-TSD  | -----                       | HERV    | ----- | ----- | DF  |
| SmNADK1            | -----ARFPGF                           | QIFY                 | -----NHD-IGEL | -----                       | HERV    | ----- | ----- | DF  |
| PpNADK1            | -----ARIPGY                           | QIFY                 | -----NQD-TSEL | -----                       | HEMV    | ----- | ----- | DF  |
| CrNADK1            | -----VAGRLDEF                         | YTYT                 | -----QAD-MERL | -----                       | AEYV    | ----- | ----- | DF  |
| VcNADK2            | -----LRGRPGY                          | YFT                  | -----ASD-KDRL | -----                       | AEYV    | ----- | ----- | DF  |
| CvNADK2 (NC64A)    | -----KGLCMGW                          | DYQ                  | -----ERD-LGEL | -----                       | HSCV    | ----- | ----- | DF  |
| CsNADK2 (C-169)    | -----AQQSDL                           | DLYN                 | -----HDE-AGRL | -----                       | HQHV    | ----- | ----- | DF  |
| MpNADK2 (CCMP1545) | GASGPGGADGAPGTSLGASAIRDLVLENVESV-PDAL | ARVIGTNATTPTEYAGV    | -----         | -----                       | -----   | ----- | ----- | DL  |
| MpNADK1 (RCC299)   | EMNEGANGSRRAPRDFAGLYD                 | -----ESEHAEEI        | -----         | REYVYSTCEALKVDEMTGRIPKEDWGT | -----   | ----- | ----- | DL  |
| OtNADK1            | -----ETADIGEDS                        | IHRASVQRSAERVRKVDGQI | -----PQEE     | -----                       | WGTI    | ----- | ----- | DI  |
| OlNADK2            | -----EDWG                             | -----                | -----         | -----                       | TT      | ----- | ----- | DI  |
| GsNADK1            | -----LANGIYVD                         | ST                   | -----MGPL     | -----                       | DKIV    | ----- | ----- | DF  |
| CmNADK2            | -----FALGTYT                          | DFHH                 | -----SQDL     | -----                       | HRCV    | ----- | ----- | DL  |
| GsNADK2            | -----KCPQLP                           | AKPV                 | -----GED-LSL  | -----                       | EKEV    | ----- | ----- | DF  |
| CmNADK1            | -----PGTLHFP                          | RE                   | -----QT       | -----                       | QTPI    | ----- | ----- | DL  |
| MpNADK1 (CCMP1545) | -----GLG-KTWA                         | -----                | QDD-DPRI      | -----                       | DGVI    | ----- | ----- | DF  |
| MpNADK2 (RCC299)   | -----GLG-EWWE                         | -----                | QDD-DPNI      | -----                       | DRLI    | ----- | ----- | DF  |
| OlNADK1            | -----AELQGD                           | QWDA                 | -----GDA-SFHL | -----                       | DEII    | ----- | ----- | DF  |
| OtNADK2            | -----VDLQCSCK                         | WDE                  | -----KDD-TFRL | -----                       | DSII    | ----- | ----- | DF  |
| VcNADK1            | -----FKEF-SIFD                        | -----                | PHVN          | -----                       | RHDI    | ----- | ----- | DF  |
| CrNADK2            | -----FKEF-SVFD                        | -----                | PRYN          | -----                       | QEEI    | ----- | ----- | DF  |
| CvNADK1 (NC64A)    | -----FSEF-EAFQ                        | -----                | PSRH          | -----                       | NPQI    | ----- | ----- | DL  |
| CsNADK1 (C-169)    | -----EFPEFGCF                         | -----                | EPR           | -----                       | ENEV    | ----- | ----- | DF  |
| CpNADK1            | -----PHFEAI                           | HDT                  | -----SEN-TFT  | -----                       | DHAAGDI | ----- | ----- | DG  |
| PtNADK5            | -----RKKS                             | IDWEPILR             | -----TNL-SQPI | -----                       | RNF     | ----- | ----- | DL  |
| VvNADK3            | -----RKKV                             | VDWQAICGNNLSQD       | -----SQPI     | -----                       | HNV     | ----- | ----- | DL  |
| CsNADK3            | -----QQKH                             | VDWEPVLR             | -----NDL-SEPI | -----                       | TNV     | ----- | ----- | DL  |
| BrNADK6            | -----NKKK                             | VEWKPISR             | -----NDV-SNPI | -----                       | RDV     | ----- | ----- | DM  |
| BrNADK5            | -----NKKP                             | VEWKPISR             | -----NDL-SHPI | -----                       | RDV     | ----- | ----- | DM  |
| AtNADK3            | -----SKKP                             | VEWKPISR             | -----NDL-SHPI | -----                       | RDV     | ----- | ----- | DM  |
| OsNADK4            | -----QRKS                             | IDWISVQR             | -----NDM-SNPI | -----                       | HDV     | ----- | ----- | DL  |
| BdNADK4            | -----QRKP                             | LEWISVQR             | -----NHL-SKPI | -----                       | HDV     | ----- | ----- | DL  |
| SiNADK4            | -----QRKS                             | LDWASVQR             | -----NNL-SQPI | -----                       | RDM     | ----- | ----- | DL  |
| ZmNADK4            | -----QRKS                             | LDWIAVQR             | -----NHL-CQPI | -----                       | RDV     | ----- | ----- | DL  |
| SbNADK4            | -----QRKS                             | LDWISVQR             | -----NHL-SQPI | -----                       | RDV     | ----- | ----- | DL  |
| SmNADK4            | -----ANMS                             | LSWDLLLR             | -----DEL-HSPI | -----                       | RNV     | ----- | ----- | DL  |
| PpNADK5            | -----SRQAHIQ                          | FE-MHLR              | -----DEL-QSPI | -----                       | RDI     | ----- | ----- | DL  |
| MpNADK3 (RCC299)   | -----TQDH                             | -----                | -----         | -----                       | VREA    | ----- | ----- | DL  |
| AmNADK1            | -----GYSRPEHP                         | VCF-TID              | -----ELV-PTGF | -----                       | DQDV    | ----- | ----- | KF  |
| PmNADK1            | -----GFANPDQ                          | HVRP-LGYT            | -----NCV-PEGF | -----                       | DSSM    | ----- | ----- | EF  |
| EcNADK1            | -----QLKNV                            | KGT                  | -----LAET     | -----                       | GQLA    | ----- | ----- | DL  |

Sub. I

Sub. II

Sub. IV

Sub. III

Outgroup

Cluster I

Cluster II

|                    | 170            | 180  | 190                        | 200  | 210              | 220       | 230            | 240          |
|--------------------|----------------|------|----------------------------|------|------------------|-----------|----------------|--------------|
| PtNADK4            | VVTLGGDGTVLWA  | ASMF | K-GPVPPIVPFS               | LGSL |                  | GFMTPFYS  | EHYRCLDSVLRG   |              |
| PtNADK1            | VVTLGGDGTVLWA  | ASMF | K-GPVPPIVSEFS              | LGSL |                  | GFMTPFHS  | EQYRCLDSILKG   |              |
| CsNADK1            | VVTLGGDGTVLWA  | ASMF | K-GPVPPIVPFS               | LGSL |                  | GFMTPFHS  | EHYRCLDSVLRG   |              |
| VvNADK2            | VVTLGGDGTVLWA  | ASLF | K-GPVPPIVPFS               | LGSL |                  | GFMTPFHS  | EQYRCLDSILRG   |              |
| AtNADK1            | LITLGGDGTVLWA  | ASMF | K-GPVPPIVPFS               | MGSL |                  | GFMTPFHS  | EQYRCLDSVLRG   |              |
| BrNADK3            | VITLGGDGTVLWA  | ASMF | K-GPVPPIVPFS               | MGSL |                  | GFMTPFHS  | EQYRCLDSVLRG   |              |
| BrNADK4            | VITLGGDGTVLWA  | ASMF | K-GPVPPIVPFS               | MGSL |                  | GFMTPFHS  | EQYRCLDSVLRG   |              |
| BrNADK1            | VITLGGDGTVLWA  | ASMF | K-GPVPPIVPFS               | MGSL |                  | GFMTPFHS  | EQYRCLDSVLRG   |              |
| SiNADK2            | IVTLGGDGTVLWA  | ASLF | K-GPVPPIVAFS               | LGSL |                  | GFMTPFPR  | EQYRCLDSVLRG   |              |
| BdNADK1            | IVTLGGDGTVLWA  | ASLF | R-GPVPPIVAFS               | LGSL |                  | GFMTPFPS  | EQYRCLDSVLRG   |              |
| OsNADK2            | IVTLGGDGTVLWA  | ASLF | K-GPVPPIVAFS               | LGSL |                  | GFMTPFSS  | EYRCLDSVLRG    |              |
| SbNADK3            | IVTLGGDGTVLWA  | ASLF | I-GPVPPIVAFS               | LGSL |                  | GFMTPFPS  | EQYRCLDSVLRG   |              |
| SiNADK1            | IVTLGGDGTVLWA  | ASLF | K-GPVPPIVAFS               | LGSL |                  | GFMTPFPS  | EQYRCLDSVLRG   |              |
| OsNADK1            | IVTLGGDGTVLWA  | ASLF | K-GPVPPIVAFS               | LGSL |                  | GFMTPFPS  | EQYRCLDSVLRG   |              |
| BdNADK2            | IVTLGGDGTVLWA  | ASLF | K-GPVPPIVAFS               | MGSL |                  | GFMTPFPS  | EQYRCLDSVLRG   |              |
| ZmNADK2            | IVTLGGDGTVLWA  | ASLF | K-GPVPPIVAFS               | LGSL |                  | GFMTPFPS  | EYRCLDSVLRG    |              |
| ZmNADK3            | IIITLGGDGTVLWA | ASLF | K-GPVPPIVAFS               | LGSL |                  | GFMTPFPS  | EYRCLDSVLRG    |              |
| SbNADK1            | IVTLGGDGTVLWA  | ASLF | K-GPVPPIVAFS               | LGSL |                  | GFMTPFPS  | EYRCLDSVLRG    |              |
| SmNADK2            | IVTLGGDGTVLWA  | ASLF | R-GPVPPIVAFS               | MGSL |                  | GFMTPFQS  | ESYRCLDSVLRG   |              |
| SmNADK3            | VITLGGDGTVLWA  | ASLF | K-GPVPPIVAFS               | MGSL |                  | GFMTAFQS  | ESYRCLDSVLRG   |              |
| PpNADK2            | VITLGGDGTVLWA  | ASLF | K-GPVPPIVAFS               | MGSL |                  | GFMTKAFQS | SMYRCLDSVLRG   |              |
| PpNADK3            | VITLGGDGTVLWA  | ANMF | K-GPVPPIVAFS               | MGSL |                  | GFMTPFRS  | DRYKCLDSVLRG   |              |
| PpNADK4            | VITLGGDGTVLWA  | ASMF | K-GPVPPIVAFS               | MGSL |                  | GFMTPFQS  | DHYKCLDSVLRG   |              |
| CrNADK3            | VVVLGGDGTVLWT  | CHIF | GNQSVPPVPEFN               | LGSL |                  | GFLTDFDP  | GSAAEVLDSVLRG  |              |
| VcNADK3            | ARSLGGDGTVLWT  | CHIF | GNQSVPPVPEFN               | LGSL |                  | GFLTDFDP  | GSAAEVLDSVLRG  |              |
| PtNADK3            | VACLGGDGTVLHA  | SNLF | R-GAVPPVSEFN               | LGSL |                  | GFLTSHYF  | EDYRCLDSVLRG   |              |
| PtNADK2            | VACLGGDGTVLHA  | SNLF | R-GAVPPVSEFN               | LGSL |                  | GFLTSHYF  | EDYRCLDSVLRG   |              |
| BrNADK2            | VACLGGDGTVLHA  | SNLF | R-GAVPPVSEFN               | LGSL |                  | GFLTSHYF  | EDYRCLDSVLRG   |              |
| AtNADK2            | VACLGGDGTVLHA  | SNLF | R-GAVPPVSEFN               | LGSL |                  | GFLTSHYF  | EDYRCLDSVLRG   |              |
| VvNADK1            | VACLGGDGTVLHA  | SNLF | R-DAVPPVSEFN               | LGSL |                  | GFLTSHYF  | EDYRCLDSVLRG   |              |
| CsNADK2            | VACLGGDGTVLHA  | SNLF | R-SAVPPVSEFN               | LGSL |                  | GFLTSHAF  | DSYRCLDSVLRG   |              |
| SiNADK3            | VACLGGDGTVLHA  | SNLF | R-TSVPVSEFN                | LGSL |                  | GFLTSHDF  | EGFRCLDSVLRG   |              |
| OsNADK3            | VACLGGDGTVLHA  | SNLF | R-TSVPVSEFN                | LGSL |                  | GFLTSHNF  | EGFRCLDSVLRG   |              |
| BdNADK3            | VACLGGDGTVLHA  | SNLF | R-TSVPVSEFN                | LGSL |                  | GFLTSHNF  | EGFRCLDSVLRG   |              |
| SbNADK2            | VACLGGDGTVLHA  | SNLF | R-TSVPVSEFN                | LGSL |                  | GFLTSHNF  | EGFRCLDSVLRG   |              |
| ZmNADK1            | VACLGGDGTVLHA  | SNLF | R-TSVPVSEFN                | LGSL |                  | GFLTSHNF  | EGFRCLDSVLRG   |              |
| SmNADK1            | VACLGGDGTVLHA  | SNLF | R-SAVPPVSEFN               | LGSL |                  | GFLTSHAF  | BAFKCLDSVLRG   |              |
| PpNADK1            | VACLGGDGTVLHA  | SNLF | R-EAVPPVSEFN               | LGSL |                  | GFLTSHAF  | BAFKCLDSVLRG   |              |
| CrNADK1            | VACLGGDGTVLHS  | SYLF | K-ASMPVIAFN                | MGSM |                  | GFLTSHDF  | SNFKCLDSVLRG   |              |
| VcNADK2            | VACLGGDGTVLHS  | SYLF | K-ASMPVIAFN                | MGSM |                  | GFLTSHDF  | SNFKCLDSVLRG   |              |
| CvNADK2 (NC64A)    | IVCLGGDGTVLHA  | ASLF | G-NALPPISEFN               | LGSL |                  | GFLTTHNY  | VDYRCLDSVLRG   |              |
| CsNADK2 (C-169)    | VACLGGDGTVLHA  | SSLF | Q-RAIPVSEFN                | AGSL |                  | GFLTNLSD  | KNVESCLDSVLRG  |              |
| MpNADK2 (CCMP1545) | IVCLGGDGTVLHA  | SKLF | Q-GPVPPIVGFH               | FGSM |                  | GFLTINHP  | PPHQAQSLDSVLRG |              |
| MpNADK1 (RCC299)   | IVCLGGDGTVLHA  | SKLF | Q-GPVPPIVGFH               | LGSM |                  | GFLTINHP  | PERMAQSLDSVLRG |              |
| OtNADK1            | VACLGGDGTVLHA  | SKLF | Q-GPVPPIVGFH               | FGSL |                  | GFLTINHP  | SDMAASLDSVLRG  |              |
| OlNADK2            | IVCLGGDGTVLHA  | SKLF | Q-GPVPPIVGFH               | FGSL |                  | GFLTINHP  | SDMAASLDSVLRG  |              |
| GsNADK1            | VACLGGDGTVLHA  | STLF | K-TAMPVIAFN                | LGSL |                  | GFLTPEFF  | SNFECLDSVLRG   |              |
| CmNADK2            | VACLGGDGTVLHA  | STLF | R-TAMPVIAFN                | LGSL |                  | GFLTPEFF  | SNFECLDSVLRG   |              |
| GsNADK2            | VACLGGDGTVLHA  | STLF | R-TAMPVIAFN                | LGSL |                  | GFLTPEFF  | SNFECLDSVLRG   |              |
| CmNADK1            | VACLGGDGTVLHA  | STLF | R-TAMPVIAFN                | LGSL |                  | GFLTPEFF  | SNFECLDSVLRG   |              |
| MpNADK1 (CCMP1545) | IVCLGGDGTVLWV  | LNLF | P-KSVPVSEFN                | MGSL |                  | GFLTSEFR  | ESIPRVVDSVLRG  |              |
| MpNADK2 (RCC299)   | IIICLGGDGTVLWV | SNLF | P-RAVPPVSEFN               | MGSL |                  | GFLTAFAE  | ESIPKAVDSVLRG  |              |
| OlNADK1            | IVVLGGDGTVLWA  | SKYF | P-KAMPVIAFN                | MGSL |                  | GFLTSHRV  | DDMEKCLDSVLRG  |              |
| OtNADK2            | VVVLGGDGTVLWA  | TKYF | P-KAMPVIAFN                | MGSL |                  | GFLTSHRV  | DDMEKCLDSVLRG  |              |
| VcNADK1            | CITLGGDGTVLYL  | TSLF | EEDPPIVGFH                 | MGTL |                  | GFLTDFDV  | ANFEATLDSVLRG  |              |
| CrNADK2            | CITLGGDGTVLHM  | ASLF | EEDPPIVGFH                 | MGSL |                  | GFLTDFDA  | AHFAPLDSVLRG   |              |
| CvNADK1 (NC64A)    | CITLGGDGTVLHL  | ASLF | VEDPPIVGFH                 | MGTL |                  | GFLTDFNA  | SMSRTVLDVLRG   |              |
| CsNADK1 (C-169)    | CITLGGDGTVLHI  | ASLF | TEDEPPIVGFH                | MGTL |                  | GFLTDFDA  | ADFQCLDSVLRG   |              |
| CpNADK1            | VVTFGGDGTVLHV  | SSLF | QSNPVPVSEFN                | LGTL |                  | GFLTDFRF  | DDYPSVLS       |              |
| PtNADK5            | VVTVGGDGTLLQA  | SHFL | ---DDSIPLVGVNSDPTQVKEVEEF  | ---  | SNEFDATRST       | CYLCAATV  | QSFEQVLDLDD    |              |
| VvNADK3            | VVTVGGDGTLLQA  | SHFM | ---DDSIPLVGVNSDPTQVQVEVEEF | ---  | SEFDASRST        | CYLCAATI  | GNFEQVLDLDD    |              |
| CsNADK3            | VVTVGGDGTLLRA  | SHFL | ---DESIPVGVNSDPTQVDEVEEF   | ---  | SNEFDASRST       | CYLCAATV  | NNFEQVLDLDD    |              |
| BrNADK6            | VITVGGDGTLLHA  | SHFL | ---DDSVPLVGVNSDPTQALEVEEF  | ---  | SDQFDASRST       | CYLCAATV  | ENFEQVLDLDD    |              |
| BrNADK5            | VITVGGDGTLLHA  | SHFI | ---DDSVHVLVGVNSDPTQAEVEEF  | ---  | SDQFDASRST       | CYLCAATV  | DNFEQVLDLDD    |              |
| AtNADK3            | VITVGGDGTLLHA  | SHFI | ---DDSVHVLVGVNSDPTQAEVEEF  | ---  | SDQFDASRST       | CYLCAATV  | ENFEQVLDLDD    |              |
| OsNADK4            | VISVGGDGTLLRA  | SHFL | ---NSSIPVGVNSDPTCPDEVEEF   | ---  | TDFDARRST        | CYLCAATA  | ANFEQVLDLDD    |              |
| BdNADK4            | VITVGGDGTLLRA  | SHFL | ---DGSIPVGVNSDPTCSEVEEF    | ---  | TDFDARRST        | CYLCAATA  | RNFEQVLDLDD    |              |
| SiNADK4            | VIAVGGDGTLLRA  | SHFL | ---DSSVPLVGVNSDPTCPKEVEEF  | ---  | IDFDARRST        | CYLCAATA  | GNFEQVLDLDD    |              |
| ZmNADK4            | VVAVGGDGTLLRA  | SHFL | ---DSSVPLVGVNSDPTCPKEVEEF  | ---  | SDFDARRST        | CYLCAATA  | GNFEQVLDLDD    |              |
| SbNADK4            | VIAVGGDGTLLRA  | SHFL | ---DSSVPLVGVNSDPTCPKEVEEF  | ---  | TDFDARRST        | CYLCAATA  | GNFEQVLDLDD    |              |
| SmNADK4            | VVTVGGDGTLLQA  | SHYL | ---DDSIPLVGVNSDPTKTDEVQEQ  | ---  | QMEFDATRSR       | CYFCAATS  | EDFEQVLDLDD    |              |
| PpNADK5            | VITVGGDGTLLQA  | SHYL | ---DSSIPLVGVNSDPTQ         | ---  | IDVEENLGRFDANRST | CYLCGATA  | ENFEQVLDLDD    |              |
| MpNADK3 (RCC299)   | VVALGGDGTLLIA  | SHLI | ---RDRAGEPLVGVNSDPTQAEVEEF | ---  | YRSSEPVDMRST     | CYLCAATA  | GNFEQVLDLDD    |              |
| AmNADK1            | AIILGGDGTLLSA  | CRQL | A-PCNVPLMTVN               | ---  | TCHM             | ---       | GFLTETVY       | NQLDEVLDLDD  |
| PmNADK1            | SIVLGGDGTLLSA  | ARQT | A-PARKEPLTIN               | ---  | TGHL             | ---       | GFLAEAYL       | SNLDEALDKIAG |
| EcNADK1            | AVVVGGDGTLLGA  | ARTL | A-RYDIKVIKIN               | ---  | RGNL             | ---       | GFLTDLDP       | DNAQQVLDLDD  |

GGDG Motif



330 340 350 360 370 380 390 400

|                    |          |             |                  |             |          |         |           |             |             |             |       |       |
|--------------------|----------|-------------|------------------|-------------|----------|---------|-----------|-------------|-------------|-------------|-------|-------|
| PtNADK4            | ---      | EYEMEEPILV  | NEVTIDRGI        | SSFLTNLECY  | CDNS     | ---     | FVTCVQG   | DGLILSTTS   | GSTAYSLAAG  | ---         | SMVHP |       |
| PtNADK1            | ---      | EYETEEPILV  | NEVTIDRGI        | SSFLANLECY  | CDNS     | ---     | FVTRVQG   | DGLILSTTS   | GSTAYSLCAGG | ---         | SMVHP |       |
| CsNADK1            | ---      | EYETEEPILV  | NEVTIDRGI        | SSYLTNLECY  | CDRS     | ---     | FVTCVQG   | DGLILSTTS   | GSTAYSLAAGG | ---         | SMVHP |       |
| VvNADK2            | ---      | EYSEGPILV   | NEVTIDRGI        | SSFLTNLECY  | SDGS     | ---     | FVTCVQG   | DGLILSTTS   | GSTAYSLAAGG | ---         | SMVHP |       |
| AtNADK1            | ---      | EYEPEETMLV  | NEVTIDRGI        | SSYLTNLECY  | CDNS     | ---     | FVTCVQG   | DGLILSTTS   | GSTAYSLAAGG | ---         | SMVHP |       |
| BrNADK3            | ---      | DYETEENMLV  | NEVTIDRGI        | TSSFLTNLECY | CDNS     | ---     | FVTCVQG   | DGLILSTTS   | GSTAYSLAAGG | ---         | SMVHP |       |
| BrNADK4            | ---      | DYETEETMLV  | NEVTIDRGI        | SSYLTNLECY  | CDNS     | ---     | FVTCVQG   | DGLILSTTS   | GSTAYSLAAGG | ---         | SMVHP |       |
| BrNADK1            | ---      | DYETEENTL   | VLEATIDRGI       | SSYLTNLECY  | CDNS     | ---     | FVTCVQG   | DGLILSTTS   | GSTAYSLAAGG | ---         | SMVHP |       |
| SiNADK2            | ---      | EVESEEPILV  | NEVTIDRGM        | SSYLTYLECY  | CDSS     | ---     | FVTCVQG   | DGLILSTTS   | GSTAYSLAAGG | ---         | SMVHP |       |
| BdNADK1            | ---      | EVEETEEPILV | NEVTIDRGM        | SSYLTYLECY  | CDSS     | ---     | FVTCVQG   | DGLILSTTS   | GSTAYSLAAGG | ---         | SMVHP |       |
| OsNADK2            | ---      | EVDTEEPILV  | NEVTIDRGM        | SSYLTYLECY  | CDSS     | ---     | FVTRVQG   | DGLILSTTS   | GSTAYSLAAGG | ---         | SMVHP |       |
| SbNADK3            | ---      | QVENEQPIV   | NEVTIDRGM        | SSYLTYLECY  | CDSS     | ---     | FVTRVQG   | DGLILSTTS   | GSTAYSLAAGG | ---         | SMVHP |       |
| SiNADK1            | ---      | ELVTEDPILV  | NEVTIDRGI        | SSYLTYLECY  | CDSS     | ---     | FVTCVQG   | DGLILSTTS   | GSTAYSLAAGG | ---         | SMVHP |       |
| OsNADK1            | ---      | ELETEEPILV  | NEVTIDRGI        | SSYLTYLECY  | CDSS     | ---     | FVTCVQG   | DGLILSTTS   | GSTAYSLAAGG | ---         | SMVHP |       |
| BdNADK2            | ---      | ELETEEPILA  | NEVTIDRGI        | SSYLTYLECY  | CDSS     | ---     | FVTCVQG   | DGLILSTTS   | GSTAYSLAAGG | ---         | SMVHP |       |
| ZmNADK2            | ---      | EIVTEEPFLV  | NEVTIDRGI        | SSYLTNLECY  | CDSS     | ---     | FVTCVQG   | DGLILSTTS   | GSTAYSLAAGG | ---         | SMVHP |       |
| ZmNADK3            | ---      | EIVSEEPFLV  | NEVTIDRGI        | SSYLTNLECY  | CDSS     | ---     | FVTCVQG   | DGLILSTTS   | GSTAYSLAAGG | ---         | SMVHP |       |
| SbNADK1            | ---      | EIMTEEPFLV  | NEVTIDRGI        | SSYLTNLECY  | CDSS     | ---     | FVTCVQG   | DGLILSTTS   | GSTAYSLAAGG | ---         | SMVHP |       |
| SmNADK2            | SRKKQAGE | VYIVLNEVA   | IDRGM            | SFLTNLECY   | CDNI     | ---     | FVTNVQG   | DGLILSTPS   | GSTAYSLAAGG | ---         | SMVHP |       |
| SmNADK3            | ---      | ASEMHLV     | NEVSDRGM         | SSYLTNLECY  | CDNV     | ---     | FLTSVQG   | DGLILSTTS   | GSTAYSLAAGG | ---         | SMVHP |       |
| PpNADK2            | DDNTSSES | AEYVLNEVS   | IDRGM            | SALSNLECY   | CDGH     | ---     | FVTVVQG   | DGLILSTPS   | GSTAYSLAAGG | ---         | SMVHP |       |
| PpNADK3            | KEGDDPCE | EHLVLENA    | IDRGM            | SFLTNLECY   | CDDI     | ---     | FLTSVQG   | DGLILSTPS   | GSTAYSLAAGG | ---         | SMVHP |       |
| PpNADK4            | EGEDPCE  | SEVHLVLENA  | IDRGM            | SNNLNECY    | CDGN     | ---     | FVTSVQG   | DGLILSTPS   | GSTAYSLAAGG | ---         | SMVHP |       |
| CrNADK3            | ---      | VLNEVIDRGI  | SSFLTNLECY       | CDGS        | ---      | LVTHVQG | DGLIVATPT | GSTAYSLAAGG | ---         | SMVHP       |       |       |
| VcNADK3            | ---      | VLNEVIDRGI  | SSFLTNLECY       | CDGT        | ---      | FVTHVQG | DGLIVATPT | GSTAYSLAAGG | ---         | SMVHP       |       |       |
| PtNADK3            | ---      | PGKVF       | DVLEVVDRG        | SNPYLSKIECY | EHDR     | ---     | LITKVOG   | DGLIVATPT   | GSTAYSLAAGG | ---         | SMVHP |       |
| PtNADK2            | ---      | PGKVF       | DVLEVVDRG        | SNPYLSKIECY | EHDR     | ---     | LITKVOG   | DGLIVATPT   | GSTAYSLAAGG | ---         | SMVHP |       |
| BrNADK2            | ---      | PGKVF       | DVLEVVDRG        | SNPYLSKIECY | EHDR     | ---     | LITKVOG   | DGLIVATPT   | GSTAYSLAAGG | ---         | SMVHP |       |
| AtNADK2            | ---      | PGKVF       | DVLEVVDRG        | SNPYLSKIECY | EHDR     | ---     | LITKVOG   | DGLIVATPT   | GSTAYSLAAGG | ---         | SMVHP |       |
| VvNADK1            | ---      | PGKIF       | DVLEVVDRG        | SNPYLSKIECY | EHDR     | ---     | LITKVOG   | DGLIVATPT   | GSTAYSLAAGG | ---         | SMVHP |       |
| CsNADK2            | ---      | PGKLF       | NILNEVVDRG       | SNPYLSKIECY | EHDR     | ---     | LITKVOG   | DGLIVATPT   | GSTAYSLAAGG | ---         | SMVHP |       |
| SiNADK3            | ---      | PGKVF       | DVLEVVDRG        | SNPYLSKIECY | EHDH     | ---     | LITKVOG   | DGLIVATPT   | GSTAYSLAAGG | ---         | SMVHP |       |
| OsNADK3            | ---      | PGKVF       | DVLEVVDRG        | SNPYLSKIECY | EHNH     | ---     | LITKVOG   | DGLIVATPT   | GSTAYSLAAGG | ---         | SMVHP |       |
| BdNADK3            | ---      | PGKVF       | DVLEVVDRG        | SNPYLSKIECY | EHNH     | ---     | LITKVOG   | DGLIVATPT   | GSTAYSLAAGG | ---         | SMVHP |       |
| SbNADK2            | ---      | PGKVF       | DVLEVVDRG        | SNPYLSKIECY | EHNH     | ---     | LITKVOA   | DGLIVATPT   | GSTAYSLAAGG | ---         | SMVHP |       |
| ZmNADK1            | ---      | PDKVF       | DVLEVVDRG        | SNPYLSKIECY | EHNH     | ---     | LITKVOG   | DGLIVATPT   | GSTAYSLAAGG | ---         | SMVHP |       |
| SmNADK1            | ---      | SGKVF       | EVLNEVVDRG       | SNPYLCKIECY | ERNR     | ---     | LITKVOA   | DGLIVATPT   | GSTAYSLAAGG | ---         | SMVHP |       |
| PpNADK1            | ---      | PGKVF       | EVLNEVVDRG       | SNPYLCKIECY | ERSR     | ---     | LITKVOA   | DGLIVATPT   | GSTAYSLAAGG | ---         | SMVHP |       |
| CrNADK1            | ---      | PEQV        | VEVLNEVDRG       | SSAFLTNLECY | EKGR     | ---     | FLSRVQA   | DGLIMLATPT  | GSTAYSLAAGG | ---         | SMVHP |       |
| VcNADK2            | ---      | PEQV        | SEVLNEVDRG       | SSAFLTNLECY | EKGR     | ---     | FLARVQA   | DGLIMLATPT  | GSTAYSLAAGG | ---         | SMVHP |       |
| CvNADK2 (NC64A)    | AGWRAG   | CEAFEVLNEV  | LDRGAN           | PYLSKIECY   | SEAGR    | ---     | LITKVOA   | DGLVMLATPT  | GSTAYSLAAGG | ---         | SMVHP |       |
| CsNADK2 (C-169)    | ---      | NTPQ        | EYEVLENEVDRG     | SNPYLAKIECY | WERDT    | ---     | LITKVOA   | DGLVMLATPT  | GSTAYSLAAGG | ---         | SMVHP |       |
| MpNADK2 (CCMP1545) | ---      | GGDGAP      | SHAYAVLNEVDRG    | SPFLSKIECY  | DRGL     | ---     | FLITIQA   | DGLVMLATPT  | GSTAYSLAAGG | ---         | SMVHP |       |
| MpNADK1 (RCC299)   | ---      | GGGGT       | PSHTFTLNEVDRG    | SPFLSKIECY  | DRGO     | ---     | LITTIQA   | DGLVMLATPT  | GSTAYSLAAGG | ---         | SMVHP |       |
| OtNADK1            | ---      | GGTQ        | QATKTVTVLNEVDRG  | SPFLSHIECY  | DRGE     | ---     | LITTIQA   | DGLIVATATPT | GSTAYSLAAGG | ---         | SMVHP |       |
| OtNADK2            | ---      | SGGT        | GEFTKKTIVLNEVDRG | SPFLSQIECY  | DRGE     | ---     | LITTIQA   | DGLIVATATPT | GSTAYSLAAGG | ---         | SMVHP |       |
| GsNADK1            | ---      | KEFQ        | ILNEVDRG         | SPFLCNLDC   | CDNK     | ---     | YITTIQA   | DGLIISTPT   | GSTAYSLAAGG | ---         | SMVHP |       |
| CmNADK2            | ---      | QQFH        | VLENEVDRG        | SPFLCQIECY  | WDDA     | ---     | PLASVQA   | DGLIIVASPT  | GSTAYSLAAGG | ---         | SMVHP |       |
| GsNADK2            | ---      | ASSKY       | KVAQLHVLNEVDRG   | PAPFLSNLLCY | ODEH     | ---     | PVTRIQA   | DGLIITATPT  | GSTAYSLAAGG | ---         | SMVHP |       |
| CmNADK1            | ---      | RPLIQ       | KTIVLNEVDRG      | PAPFLSNLECY | DDF      | ---     | PVTRIQA   | DGLIITATPT  | GSTAYSLAAGG | ---         | SMVHP |       |
| MpNADK1 (CCMP1545) | ---      | RRRH        | IVLNEVDRG        | ANSTLIDL    | DVNDGN   | ---     | PMTKVLA   | DGLVISTPT   | GSTAYSLAAGG | ---         | SMVHP |       |
| MpNADK2 (RCC299)   | ---      | RERH        | VLENEVDRG        | ARSQIDL     | DVNDGN   | ---     | PMTKVLA   | DGLVISTPT   | GSTAYSLAAGG | ---         | SMVHP |       |
| OtNADK1            | ---      | QWRV        | VLENEVDRG        | PKPVMVELD   | IAVDGY   | ---     | HVKVAA    | DGLVISTPT   | GSTAYSLAAGG | ---         | SMVHP |       |
| OtNADK2            | ---      | PWRY        | VLENEVDRG        | PKPVMVELD   | IAVDGY   | ---     | KVKVAA    | DGLIVATPT   | GSTAYSLAAGG | ---         | SMVHP |       |
| VcNADK1            | ---      | AVHH        | VLENEVDRG        | AFPGAVLLEIF | VDGS     | ---     | YVNVEA    | DGLIISTPS   | GSTAYSLAAGG | ---         | SMVHP |       |
| CrNADK2            | ---      | EVHH        | VLENEVDRG        | AFPGAVLLEIF | VDGS     | ---     | YVNVEA    | DGLIISTPS   | GSTAYSLAAGG | ---         | SMVHP |       |
| CvNADK1 (NC64A)    | ---      | RVHH        | VLENEVDRG        | AFPGAVLLEIF | VDGS     | ---     | HLITQA    | DGLIITATPS  | GSTAYSLAAGG | ---         | SMVHP |       |
| CsNADK1 (C-169)    | ---      | AVHH        | VLENEVDRG        | AFPGAVLLEIF | VDGH     | ---     | HLITVRA   | DGLIITATPS  | GSTAYSLAAGG | ---         | SMVHP |       |
| CpNADK1            | ---      | MVHA        | LNEVDRG          | AEALNMP     | EFQFCGGR | ---     | LAATMPA   | DGLIIVSSAT  | GSTAYSLAAGG | ---         | SMVHP |       |
| PtNADK5            | ---      | STYAL       | NDILVAHPC        | PATVSRFSFR  | IQRDS    | ESCG    | ---       | PLVNCRS     | DGLRVSTAA   | GSTAYSLAAGG | ---   | SMVHP |
| VvNADK3            | ---      | PTYAL       | NDILVAHPC        | PATVSRFSFR  | IKREGH   | PCS     | ---       | PLVHCRS     | DGLRVSTAA   | GSTAYSLAAGG | ---   | SMVHP |
| CsNADK3            | ---      | SKYPL       | NDVLAHPC         | PASVSRFSFR  | IRNEQ    | SCL     | ---       | PLLNCRS     | DGLRVSTAA   | GSTAYSLAAGG | ---   | SMVHP |
| BrNADK6            | ---      | LSHAL       | NDVLAHPC         | PAVSRFSFR   | IKSKDGY  | TSQ     | ---       | KTVNCRS     | DGLRVCTAA   | GSTAYSLAAGG | ---   | SMVHP |
| BrNADK5            | ---      | LSHAL       | NDVLAHPC         | PAVSRFSFR   | IKKDCD   | TNP     | ---       | KTVNCRS     | DGLRVCTAA   | GSTAYSLAAGG | ---   | SMVHP |
| AtNADK3            | ---      | LSHAL       | NDVLAHPC         | PAVSRFSFR   | IKKNDG   | SSP     | ---       | KTVNCRS     | DGLRVCTAA   | GSTAYSLAAGG | ---   | SMVHP |
| OsNADK4            | ---      | PTYAL       | NDILVSHPC        | PASVSRFSFR  | KRSNTG   | ESS     | ---       | HLINCRS     | DGLRVSTAA   | GSTAYSLAAGG | ---   | SMVHP |
| BdNADK4            | ---      | PTYAL       | NDILVSHPC        | PASVSRFSFR  | KRSNTG   | ESS     | ---       | HLINCRS     | DGLRVSTAA   | GSTAYSLAAGG | ---   | SMVHP |
| SiNADK4            | ---      | PTYAL       | NDILVSHPC        | PASVSRFSFR  | KRSNTG   | ESS     | ---       | HLINCRS     | DGLRVSTAA   | GSTAYSLAAGG | ---   | SMVHP |
| ZmNADK4            | ---      | PTYAL       | NDILVSHPC        | PASVSRFSFR  | KRSNTG   | ESS     | ---       | RLINCRS     | DGLRVSTAA   | GSTAYSLAAGG | ---   | SMVHP |
| SbNADK4            | ---      | PTYAL       | NDILVSHPC        | PASVSRFSFR  | KRSNTG   | ESS     | ---       | RLINCRS     | DGLRVSTAA   | GSTAYSLAAGG | ---   | SMVHP |
| SmNADK4            | ---      | STPAL       | NDVLAHPC         | PAVSRCTF    | SVVNTQ   | TKSG    | ---       | SLIHSRS     | DGLRVCTAA   | GSTAYSLAAGG | ---   | SMVHP |
| PpNADK5            | ---      | DTPAL       | NDILVAHPC        | PAVSRCTF    | SVVNTQ   | TKSG    | ---       | SLIHSRS     | DGLRVCTAA   | GSTAYSLAAGG | ---   | SMVHP |
| MpNADK3 (RCC299)   | ---      | APAL        | NDVLAHPC         | PAVSRCTF    | SVVNTQ   | TKSG    | ---       | LWFHVS      | DGLRVCTAA   | GSTAYSLAAGG | ---   | SMVHP |
| AmNADK1            | ---      | WEAL        | SLNEMLLHKE       | PLAGMCHFE   | IAVGEH   | ---     | AVVDIAS   | DGLVISTPT   | GSTAYSLAAGG | ---         | SMVHP |       |
| PmNADK1            | ---      | WESL        | CLNEMLLHKE       | PLAGMCHFE   | IAVGRH   | ---     | APVDISA   | DGLVISTPT   | GSTAYSLAAGG | ---         | SMVHP |       |
| EcNADK1            | ---      | RISTA       | INEVVLHPCK       | VAHMI       | EFVYIDEI | ---     | FAFSORS   | DGLIISTPT   | GSTAYSLAAGG | ---         | SMVHP |       |

Sub. I

Sub. II

Sub. IV

Sub. III

Outgroup

Cluster I

Cluster II

NE/D Motif

Gly-rich Motif

|  |                    |                                                 |      |              |                          |
|--|--------------------|-------------------------------------------------|------|--------------|--------------------------|
|  | PtNADK4            | VPGILFTPICPHSLSFRPLILPEHVTIRVQVFPNSRSPAWASFD    | ---- | GKDRKQ       | -LAAGDALVCSMAPVPVPTACQI  |
|  | PtNADK1            | VPGILFTPICPHSLSFRPLILPEHVTIRVQVFPNSRSPAWASFD    | ---- | GKDRKQ       | -LAAGDALVCSMAPVPVPTACQI  |
|  | CsNADK1            | VPGILFTPICPHSLSFRPLILPEYVTIRIQVFPNSRGHAWASFD    | ---- | GKDRKQ       | -LAAGDALVCSMAPVPVPTACQV  |
|  | VvNADK2            | VPGILFTPICPHSLSFRPLILPEHVTIRVQVFPNSRGHAWASFD    | ---- | GKDRKQ       | -LAPGDALVCSMAPCPVPTACQV  |
|  | AtNADK1            | VPGILFTPICPHSLSFRPLILPEHVTIRVQVFPNSRSAWVSFD     | ---- | GKDRKQ       | -LEAGDALVCSMAPVPVPTACQV  |
|  | BrNADK3            | VPGILFTPICPHSLSFRPLILPEHVTIRVQVFPNSRSAWVSFD     | ---- | GKDRKQ       | -LEAGDALVCSMAPVPVPTACQV  |
|  | BrNADK4            | VPGILFTPICPHSLSFRPLILPEHVTIRVQVFPNSRGSWVSFD     | ---- | GKDRKQ       | -LEAGDALVCSMAPVPVPTACQV  |
|  | BrNADK1            | VPGILFTPICPHSLSFRPLILPEHVTIRVQVFPNSRSAWVSFD     | ---- | GKDRKQ       | -LEAGDALVCSMAPVPVPTACQV  |
|  | SiNADK2            | VPGILFTPICPHSLSFRPLILPEYVTLRVQVFPNSRGOAWASFD    | ---- | GKGRIQ       | -LPGDALICSIISPWPVPTACL   |
|  | BdNADK1            | VPGILFTPICPHSLSFRPLILPEYVTLRVQVFPNSRGOAWASFD    | ---- | GKGRIQ       | -LPGDALICSIISPWPVPTACL   |
|  | OsNADK2            | VPGILFTPICPHSLSFRPLILPEYVTLRVQVFPNSRGOAWASFD    | ---- | GKGRKQ       | -LPGDALICSIISPWPVPTACL   |
|  | SbNADK3            | VPGILFTPICPHSLSFRPLILPEYVTLRVQVFPNSRGOAWASFD    | ---- | GKGRKQ       | -LPGDALICSIISPWPVPTACL   |
|  | SiNADK1            | VPGILFTPICPHSLSFRPLILPEYVTLRVQVFPNSRGOAWASFD    | ---- | GKGRKQ       | -LPGDALICSIISPWPVPTACL   |
|  | OsNADK1            | VPGILFTPICPHSLSFRPLILPEYVTLRVQVFPNSRGOAWASFD    | ---- | GKDRKL       | -LSPGDALICSIISPWPVPTACL  |
|  | BdNADK2            | VPGILFTPICPHSLSFRPLILPEYVTLRVQVFPNSRGOAWASFD    | ---- | GKDRKQ       | -LAPGDALICSIISPWPVPTACL  |
|  | ZmNADK2            | VPGILFTPICPHSLSFRPLILPEYVTLRVQVFPNSRGOAWASFD    | ---- | GKDRKQ       | -LSPGDALICSIISPWPVPTACL  |
|  | ZmNADK3            | VPGILFTPICPHSLSFRPLILPEYVTLRVQVFPNSRGOAWASFD    | ---- | GKDRKQ       | -LSPGDALICSIISPWPVPTACL  |
|  | SbNADK1            | VPGILFTPICPHSLSFRPLILPEYVTLRVQVFPNSRGAWASFD     | ---- | GKDRKQ       | -LSPGDALICSIISPWPVPTACL  |
|  | SmNADK2            | VAAMLFTPICPHSLSFRPLILPEHVTIRVQVPEKSRGDWVSFD     | ---- | GRERLQ       | -LGGDALVCHLSSVPVPTACL    |
|  | SmNADK3            | VPAILFTPICPHSLSFRPLILPEYVTLRVQVPLQNA---         | ---- | GKDRVE       | -LSPGQLICQMSPVPTASLE     |
|  | PpNADK2            | VPGILFTPICPHSLSFRPLILPEYVTLRVQVPLNCRGOAWASFD    | ---- | GKGRKQ       | -LWGGDALIVRMSEVPVPAVCEK  |
|  | PpNADK3            | VPGILFTPICPHSLSFRPLILPEYVTLRVQVFPNSRGOAWASFD    | ---- | GKDRKQ       | -LNEGDAALLCHMSAPVPAACDI  |
|  | PpNADK4            | VPGILFTPICPHSLSFRPLILPEYVTLRVQVFPNSRGOAWASFD    | ---- | GKDRKQ       | -LWGGDALIVRMSEVPVPAVCEK  |
|  | CrNADK3            | VPGILFTPICPHSLSFRPLILPEYVTLRVQVFPNSRGOAWASFD    | ---- | GKDRQA       | -LWGGDALIVRMSEVPVPAVCEK  |
|  | VcNADK3            | VPGILFTPICPHSLSFRPLILPEYVTLRVQVFPNSRGOAWASFD    | ---- | GKDRQA       | -LWGGDALIVRMSEVPVPAVCEK  |
|  | PtNADK3            | VPCLMLFTPICPHSLSFRPVLILPDSARLELKIPEADARSNAWVSFD | ---- | GKRRKQ       | -LSRQSVRISSMSQHPPLPTVNKS |
|  | PtNADK2            | VPCLMLFTPICPHSLSFRPVLILPDSARLELKIPEADARSNAWVSFD | ---- | GKRRKQ       | -LSRQSVRISSMSQHPPLPTVNKS |
|  | BrNADK2            | VPCLMLFTPICPHSLSFRPVLILPDSARLELKIPEADARSNAWVSFD | ---- | GKRRKQ       | -LSRQSVRISSMSQHPPLPTVNKS |
|  | AtNADK2            | VPCLMLFTPICPHSLSFRPVLILPDSARLELKIPEADARSNAWVSFD | ---- | GKRRKQ       | -LSRQSVRISSMSQHPPLPTVNKS |
|  | VvNADK1            | VPCLMLFTPICPHSLSFRPVLILPDSARLELKIPEADARSNAWVSFD | ---- | GKRRKQ       | -LSRQSVRISSMSQHPPLPTVNKS |
|  | CsNADK2            | VPCLMLFTPICPHSLSFRPVLILPDSARLELKIPEADARSNAWVSFD | ---- | GKRRKQ       | -LSRQSVRISSMSQHPPLPTVNKS |
|  | SiNADK3            | VPCLMLFTPICPHSLSFRPVLILPDSARLELKIPEADARSNAWVSFD | ---- | GKRRKQ       | -LSRQSVRISSMSQHPPLPTVNKS |
|  | OsNADK3            | VPCLMLFTPICPHSLSFRPVLILPDSARLELKIPEADARSNAWVSFD | ---- | GKRRKQ       | -LSRQSVRISSMSQHPPLPTVNKS |
|  | BdNADK3            | VPCLMLFTPICPHSLSFRPVLILPDSARLELKIPEADARSNAWVSFD | ---- | GKRRKQ       | -LSRQSVRISSMSQHPPLPTVNKS |
|  | SbNADK2            | VPCLMLFTPICPHSLSFRPVLILPDSARLELKIPEADARSNAWVSFD | ---- | GKRRKQ       | -LSRQSVRISSMSQHPPLPTVNKS |
|  | ZmNADK1            | VPCLMLFTPICPHSLSFRPVLILPDSARLELKIPEADARSNAWVSFD | ---- | GKRRKQ       | -LSRQSVRISSMSQHPPLPTVNKS |
|  | SmNADK1            | VPCLMLFTPICPHSLSFRPVLILPDSARLELKIPEADARSNAWVSFD | ---- | GKRRKQ       | -LSRQSVRISSMSQHPPLPTVNKS |
|  | PpNADK1            | VPCLMLFTPICPHSLSFRPVLILPDSARLELKIPEADARSNAWVSFD | ---- | GKRRKQ       | -LSRQSVRISSMSQHPPLPTVNKS |
|  | CrNADK1            | VPAILLTPVCPHSLSFRPVLILPDYAELELRIPDNARCTAWVCFD   | ---- | GRSRQE       | -LGRGDSVKVRMSENPVPTINRT  |
|  | VcNADK2            | VPAILLTPVCPHSLSFRPVLILPDYAELELRIPDNARCTAWVCFD   | ---- | GRSRQE       | -LGRGDSVKVRMSENPVPTINRT  |
|  | CvNADK2 (NC64A)    | VPAILLTPVCPHSLSFRPVLILPDYAELELRIPDNARCTAWVCFD   | ---- | GRDSRE       | -LARGDSIKVRMSENPVPTINNA  |
|  | CsNADK2 (C-169)    | VPAILLTPVCPHSLSFRPVLILPDYAELELRIPDNARCTAWVCFD   | ---- | GKORQE       | -LARGDSIKVRMSENPVPTINNA  |
|  | MpNADK2 (CCMP1545) | VPAILLTPVCPHSLSFRPVLILPDYAELELRIPDNARCTAWVCFD   | ---- | GKORQE       | -LARGDSIKVRMSENPVPTINNA  |
|  | MpNADK1 (RCC299)   | VPAILLTPVCPHSLSFRPVLILPDYAELELRIPDNARCTAWVCFD   | ---- | GKORQE       | -LARGDSIKVRMSENPVPTINNA  |
|  | OtNADK1            | VPAILLTPVCPHSLSFRPVLILPDYAELELRIPDNARCTAWVCFD   | ---- | GRDRCE       | -LESQSVFVRMSENPVPTINNA   |
|  | OtNADK2            | VPAILLTPVCPHSLSFRPVLILPDYAELELRIPDNARCTAWVCFD   | ---- | GRDRCE       | -LESQSVFVRMSENPVPTINNA   |
|  | GsNADK1            | VPAILLTPVCPHSLSFRPVLILPDYAELELRIPDNARCTAWVCFD   | ---- | GRDRCE       | -LESQSVFVRMSENPVPTINNA   |
|  | CmNADK2            | VPAILLTPVCPHSLSFRPVLILPDYAELELRIPDNARCTAWVCFD   | ---- | GKBRQE       | -LGRGDSIKVRMSENPVPTINNA  |
|  | GsNADK2            | VPAILLTPVCPHSLSFRPVLILPDYAELELRIPDNARCTAWVCFD   | ---- | GKBRQE       | -LGRGDSIKVRMSENPVPTINNA  |
|  | CmNADK1            | VPAILLTPVCPHSLSFRPVLILPDYAELELRIPDNARCTAWVCFD   | ---- | GKBRQE       | -LGRGDSIKVRMSENPVPTINNA  |
|  | MpNADK1 (CCMP1545) | VSGVLEVPICPHSLSFRPVLILPDSVVLITRVPEARVEPYASFD    | ---- | GKORQE       | -LARGDSIKVRMSENPVPTINNA  |
|  | MpNADK2 (RCC299)   | VPGILEVPICPHSLSFRPVLILPDSVVLITRVPEARVEPYASFD    | ---- | GKORQE       | -LARGDSIKVRMSENPVPTINNA  |
|  | OtNADK1            | VPAILLTPVCPHSLSFRPVLILPDSVVLITRVPEARVEPYASFD    | ---- | GKORQE       | -LARGDSIKVRMSENPVPTINNA  |
|  | OtNADK2            | VPAILLTPVCPHSLSFRPVLILPDSVVLITRVPEARVEPYASFD    | ---- | GKORQE       | -LARGDSIKVRMSENPVPTINNA  |
|  | VcNADK1            | VPCTVFTPTIAPLSLSFRPVLILPESSSICVHLPTCARSHARASFD  | ---- | GKQPMR       | -VRRGTSIFFTTSLQPLPVLISLG |
|  | CrNADK2            | VPCTVFTPTIAPLSLSFRPVLILPESSSICVHLPTCARSHARASFD  | ---- | GKQPMR       | -VRRGTSIFFTTSLQPLPVLISLG |
|  | CvNADK1 (NC64A)    | VPCTVFTPTIAPLSLSFRPVLILPESSSICVHLPTCARSHARASFD  | ---- | GKQPMR       | -VRRGTSIFFTTSLQPLPVLISLG |
|  | CsNADK1 (C-169)    | VPCTVFTPTIAPLSLSFRPVLILPESSSICVHLPTCARSHARASFD  | ---- | GKQPMR       | -VRRGTSIFFTTSLQPLPVLISLG |
|  | CpNADK1            | VE-----VAEGSRGATATFD                            | ---- | GRFPQK       | -LAPGDAVEVQESPVPLPAVRS   |
|  | PtNADK5            | LQYMVREPTISFGA-AIR-LMHGIIKSDQSMKASWFSKKGVIYID   | ---- | GSHVFSIQHGD  | TLETSSKAPSLKVLFLPH       |
|  | VvNADK3            | LQYMVREPTISFGA-AYSSLMHGLLKPDQSMVASWFSKKGVIYID   | ---- | GSDVSYSIKYGD | TLETSSKAPSLKVLFLPH       |
|  | CsNADK3            | LQYMVREPTISFGKLY--SYMHGITSPDQSIEMAWLCNEGMIYID   | ---- | GSHVCHPIQYGD | TLETSSKAPSLKVLFLPH       |
|  | BrNADK6            | LQFMVREPTISFGSRA--TMHSSFKPDQSMVDVNWYSDHGTIYID   | ---- | GCQVRYNVQLGD | TLETSSDAPVLNVFLSQ        |
|  | BrNADK5            | LQFMVREPTISFGPTLSQ--MHSAFKPDQSLDWNWYSDHGTIYID   | ---- | GCQVRYNVQLGD | TLETSSDAPVLNVFLSQ        |
|  | AtNADK3            | LQFMVREPTISFGSTA--SEMHSFKPDQSMVDVNWYSDHGTIYID   | ---- | GCQVQHSVQLGD | TLETSSDAPVLNVFLSH        |
|  | OsNADK4            | LQYMIREPTISPRD-ADKPLHGLVKQEQHILVWYNEEGAVYFD     | ---- | GSHVMHSIQHGD | TLETSSDAPILKVLILPE       |
|  | BdNADK4            | LQYMIREPTISPRD-ADKPLHGLVKQEQHILVWYNEEGAVYFD     | ---- | GSHVMYSIQHGD | TLETSSDAPILKVLILPE       |
|  | SiNADK4            | LQYMIREPTISPRD-KPLHGLVKQEQHILVWYNEEGAVYFD       | ---- | TAHM         |                          |
|  | ZmNADK4            | LQYMIREPTISPRD-ADKAMLDHVLKQEQHMLVWYNEEGAVYFD    | ---- | GSHVVHSIQHGD | SLETSSGAPTLKVLILPE       |
|  | SbNADK4            | LQYMIREPTISPRD-ADKMLHGLVKQEQHMLVWYNEEGAVYFD     | ---- | GSHVVHSIQHGD | SLETSSGAPTLKVLILPE       |
|  | SmNADK4            | LQYMIREPTISPRD-KQKNLMHGFVGSSTAIQVWGCRCGSIYFD    | ---- | GAHVSAPIKFG  | VVTTISASGPEVKVFLAQ       |
|  | PpNADK5            | LQYMVREPTISPHP-KYTSFLKGFVEEDHVLQVDWRSRKGITVYFD  | ---- | GSHLCYPIISFG | SKIGVSNAPPLRIFWAO        |
|  | MpNADK3 (RCC299)   | MQFMDREPTIYHDHAPPDSDGHGFYEDGEMCLRWNSRVGTVYLD    | ---- | GAHVTHAVKMG  | DRVTSNAPPLRLFTSA         |
|  | AmNADK1            | VPVQMQLPICPHSLASRALVFADTEPLEV-VPANQQ-QLVLEVD    | ---- | GNAGCY       | -LAPGDRVRVVIKSPYSARFIRLG |
|  | PmNADK1            | CEVVQLTPTIAPHSLASRALVFADTEPLEV-VMVVD            | ---- | GNAGCY       | -LWPPDRVLRIRKSKHSVKFIRLE |
|  | EcNADK1            | LDATITLVMPFPHLSARPLVINSSTIRLRFSH-RRNDLEISCD     | ---- | SQIALP       | -LQEGEDVLRRCYDHLNLIHPK   |

Sub. I

Sub. II

Sub. IV

Sub. III

Outgroup

Cluster I

Cluster II

**Figure S1.** Amino acid sequences alignment analysis of NAD\_Kinase domain of NADK proteins.

Amino acid sequences alignment and WebLogo analysis of NAD\_Kinase domain in NADK genes from 24 species representing eight major lineages of the plantae: the glaucophytes (*Cyanophora paradoxa*), the rhodophytes (*Cyanidioschyzon merolae* and *Galdieria sulphuraria*), the chlorophytes (*Ostreococcus tauri*, *Ostreococcus lucimarinus*, *Micromonas pusilla* RCC299, *Micromonas pusilla* CCMP1545, *Chlorella variabilis* NC64A, *Coccomyxa subellipsoidea* C-169, *Chlamydomonas reinhardtii* and *Volvox carteri*), the bryophytes (*Physcomitrella patens*), the lycophytes (*Selaginella moellendorffii*), the gymnosperms (*Picea sitchensis*), the eudicots (*Arabidopsis thaliana*, *Populus trichocarpa*, *Cucumis sativus*, *Brassica rapa* and *Vitis vinifera*) and the monocots (*Brachypodium distachyon*, *Oryza sativa*, *Setaria italica*, *Sorghum bicolor* and *Zea mays*). Only CpNADK2 (ID, Contig53995) protein in *Cyanophora paradoxa* without complete NADK\_Kinase domain is excluded, while the three outgroups of EcNADK1 (ID, EBESCP00000000630 or A7ZQ55) from *Escherichia coli* K-12, AmNADK1 (ID, AM1\_1113 or B0C2T6) from *Acaryochloris marina* MBIC11017 and PmNADK1 (ID, P9301\_14541 or A3PEA2) from *Prochlorococcus marinus* MIT 9301 are included in the alignment. Positions of the alignments where more than 50% of the sequences are identical are shown with black boxes. The four conserved NADK subfamilies are represented as sub. I, sub. II, sub. III and sub. IV at the left side of the alignment.
