# Supplementary material for: Genome-Wide Analysis of the NADK Gene Family in Plants
Source: PubMed Central journal article supplement (PMC4072752; doi:10.1371/journal.pone.0101051), 2014-06-26
Supplement: pone.0101051.s003.pdf [file pone.0101051.s003.pdf]

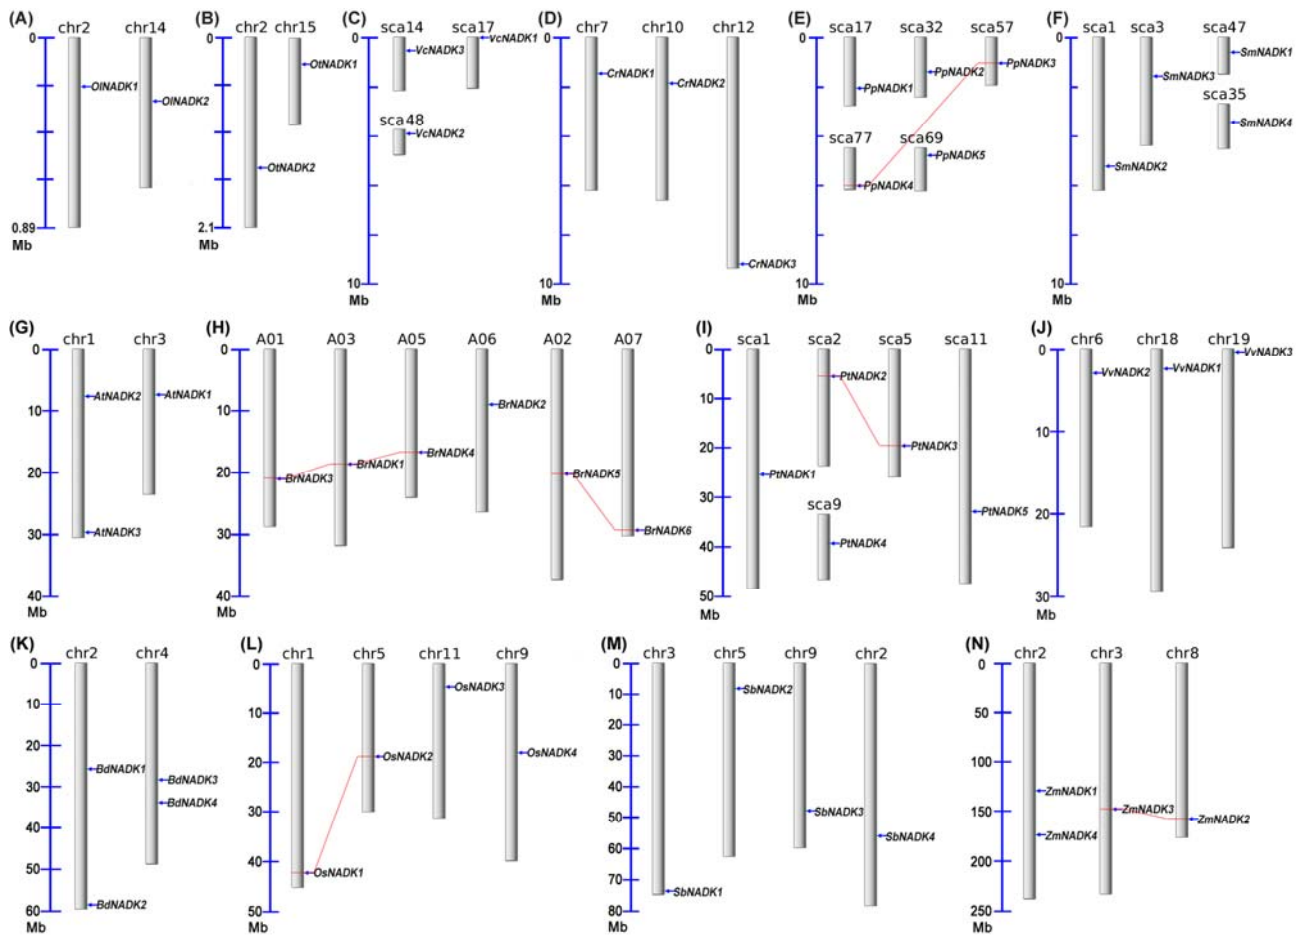

**Figure S3** Chromosomal locations of NADK family genes in plants.

Chromosomal locations of NADK family genes in algae *vir. Ostreococcus lucimarinus* (A), *Ostreococcus tauri* (B), *Volvox carteri* (C) and *Chlamydomonas reinhardtii* (D); bryophytes *vir. Physcomitrella patens* (E); lycophytes *vir. Selaginella moellendorffii* (F); eudicots *vir. Arabidopsis thaliana* (G), *Brassica rapa* (H), *Populus trichocarpa* (I) and *Vitis vinifera* (J); monocots *vir. Brachypodium distachyon* (K), *Oryza sativa* (L), *Sorghum bicolor* (M) and *Zea mays* (N), respectively. The red lines connected two NADK genes stand for the duplication blocks of NADK homologues in intra-species (Figure S4).
