# Supplementary material for: Genome-Wide Analysis of the NADK Gene Family in Plants
Source: PubMed Central journal article supplement (PMC4072752; doi:10.1371/journal.pone.0101051), 2014-06-26
Supplement: pone.0101051.s006.pdf [file pone.0101051.s006.pdf]

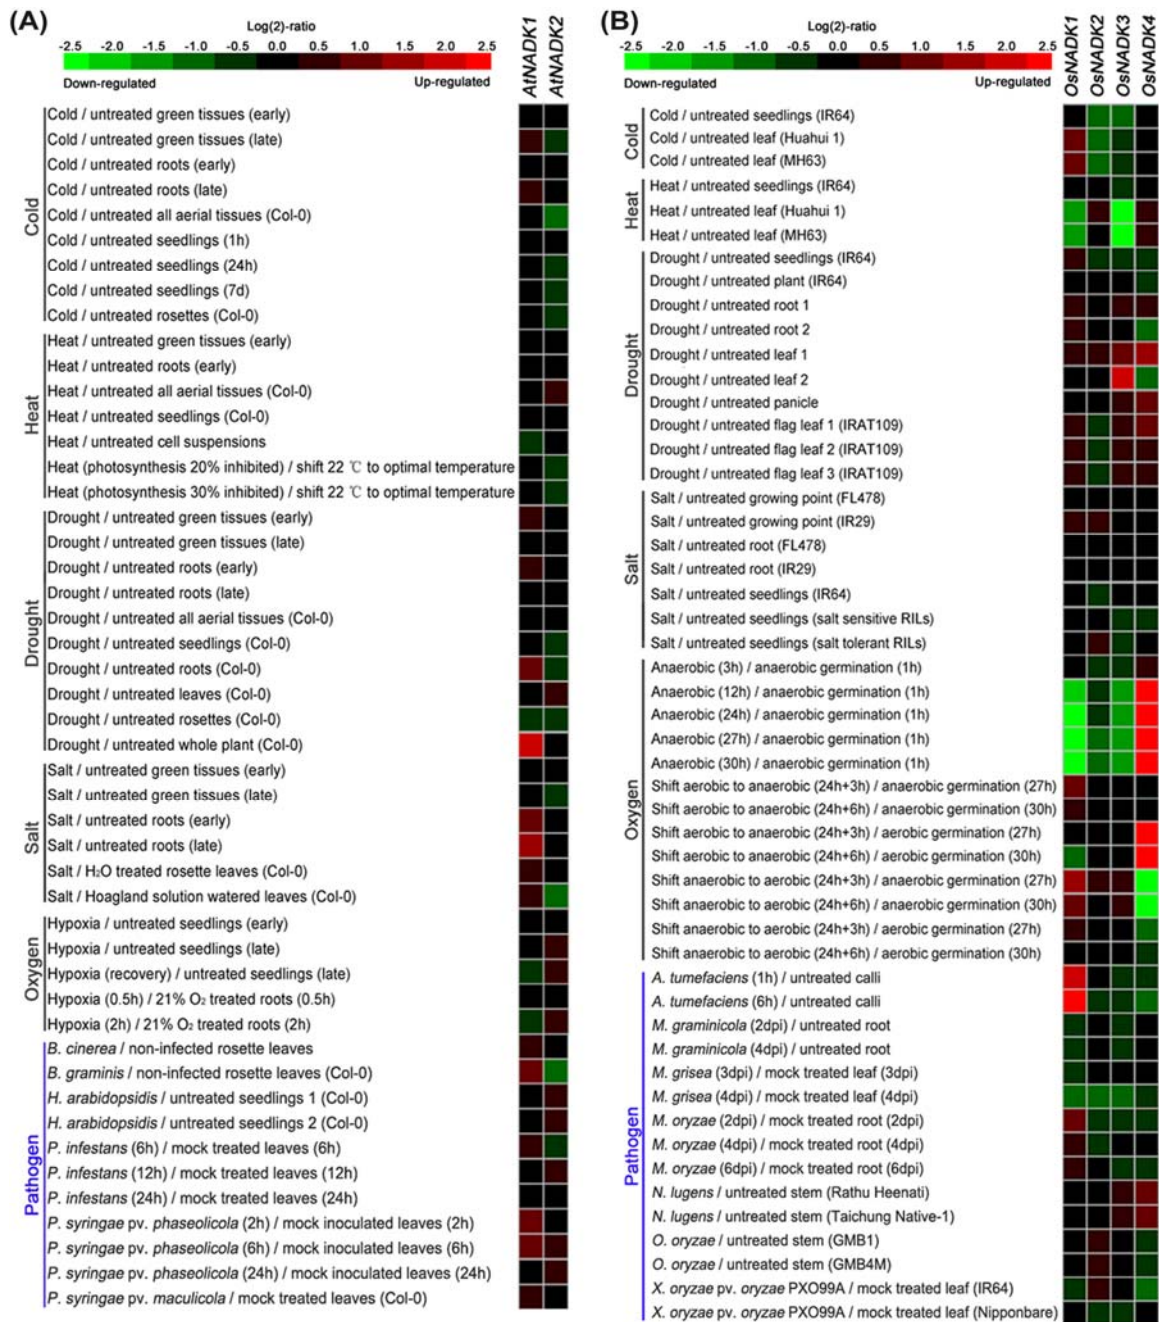

**Figure S6** Expression patterns of NADK family genes in Arabidopsis and rice under abiotic and biotic stresses.

Expression profiles obtained from (A) Arabidopsis and (B) rice microarray data in Genevestigator illustrating differential expression of *AtNADK1/2* and *OsNADK1–4* under different abiotic/biotic stresses, including cold, heat, drought, salt, hypoxia and pathogens. Results are shown as heat maps with green/red representing the indicated relative signal values.
