# Supplementary material for: Genome-Wide Analysis of the NADK Gene Family in Plants
Source: PubMed Central journal article supplement (PMC4072752; doi:10.1371/journal.pone.0101051), 2014-06-26
Supplement: pone.0101051.s007.pdf [file pone.0101051.s007.pdf]

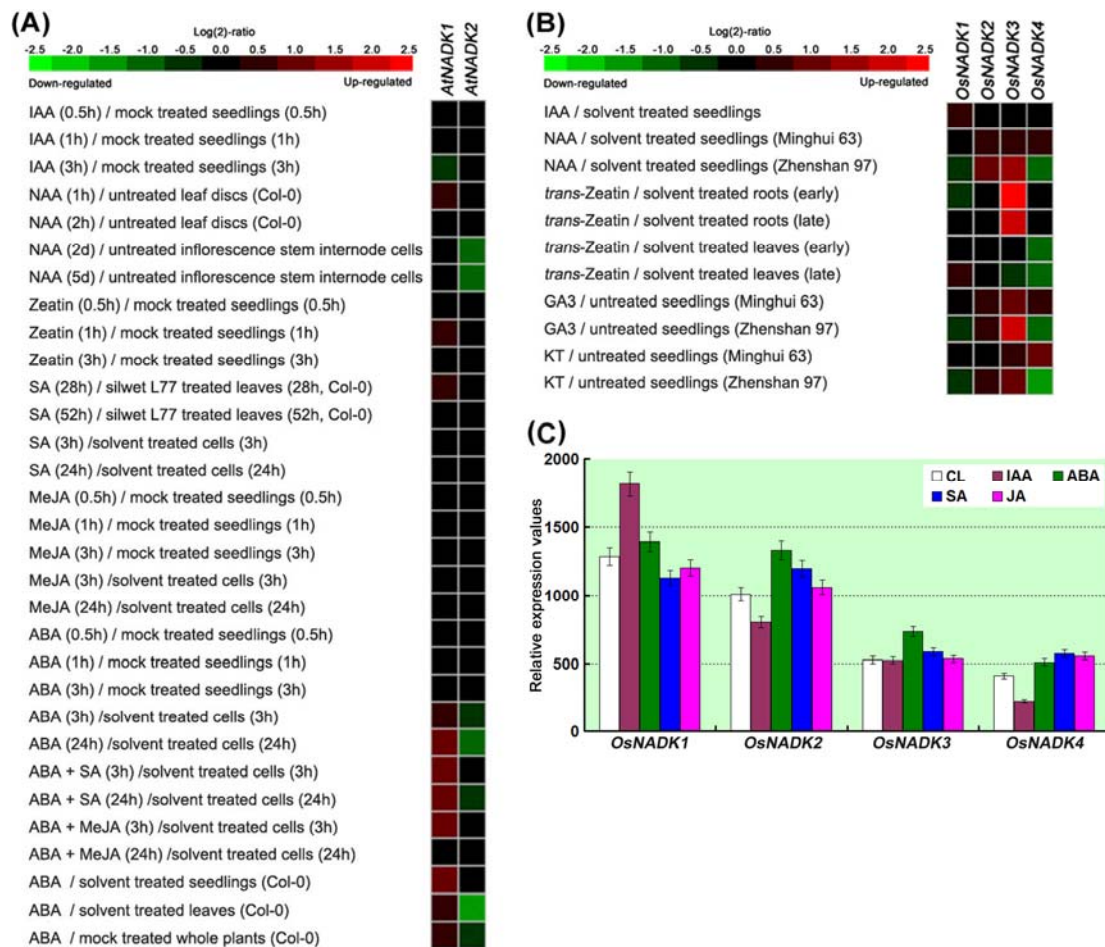

**Figure 7** Expression patterns of NADK family genes in Arabidopsis and rice with various hormone treatments.

Expression profiles obtained from (A) Arabidopsis and (B) rice microarray data in Genevestigator illustrating differential expression of *AtNADK1/2* and *OsNADK1–4* under different hormone treatments, including auxins (IAA, NAA), zeatin, SA, ABA, gibberellin and kinetin. Results are shown as heat maps with green/red representing the indicated relative signal values. (C) The relative expression of *OsNADK* genes in response to the hormones IAA, ABA, SA and JA compared to the control (CL), obtained from microarray (Gene Expression Omnibus, GEO; GSE37557). Values are the mean  $\pm$  the standard deviation of three independent biological replicates.
