# Supplementary material for: Genome-Wide Analysis of the NADK Gene Family in Plants
Source: PubMed Central journal article supplement (PMC4072752; doi:10.1371/journal.pone.0101051), 2014-06-26
Supplement: pone.0101051.s008.pdf [file pone.0101051.s008.pdf]

**Table S1.** The NADK family genes in plants

| Lineages     | Species*                                | Locus Name / ID <sup>&amp;</sup>        | Nomenclature              | A. A. | Accession No. <sup>#</sup> | E value <sup>\$</sup> | Subfamily |
|--------------|-----------------------------------------|-----------------------------------------|---------------------------|-------|----------------------------|-----------------------|-----------|
| Bacteria     | <i>Escherichia coli</i> K-12            | EBESCP00000000630 (A7ZQ55)              | <i>EcNADK1</i>            | 292   | NP_417105.1                | 5.3E-110              | Outgroup  |
| Cyanobactes  | <i>Acaryochloris marina</i> MBIC11017   | AM1_1113 (B0C2T6)                       | <i>AmNADK1</i>            | 305   | YP_001515466.1             | 2.6E-72               |           |
|              | <i>Prochlorococcus marinus</i> MIT 9301 | P9301_14541 (A3PEA2)                    | <i>PmNADK1</i>            | 302   | YP_001091678.1             | 7.7E-79               |           |
| Glaucophytes | <i>Cyanophora paradoxa</i>              | Contig7106                              | <i>CpNADK1</i>            | 280   | NA                         | 1.4E-15               | Sub. IV   |
|              |                                         | Contig53995                             | <i>CpNADK2</i>            | 240   | NA                         | 6.1E-10               | Excluded  |
| Rhodophytes  | <i>Cyanidioschyzon merolae</i>          | CMP315C                                 | <i>CmNADK1</i>            | 511   | BAM81909.1                 | 2.4E-57               | Sub. II   |
|              |                                         | CMT143C                                 | <i>CmNADK2</i>            | 877   | BAM83146.1                 | 4.2E-56               | Sub. II   |
|              | <i>Galdieria sulphuraria</i>            | 452825095 (EME32094.1)                  | <i>GsNADK1</i>            | 738   | EME32094.1                 | 8.1E-57               | Sub.II    |
|              |                                         | 452825589 (EME32585.1)                  | <i>GsNADK2</i>            | 481   | EME32585.1                 | 6.5E-50               | Sub.II    |
| Chlorophytes | <i>Ostreococcus tauri</i>               | 4002 (gw1.15.00.172.1)                  | <i>OtNADK1</i>            | 721   | XP_003083231.1             | 9.8E-57               | Sub.II    |
|              |                                         | 8188 (fgenes1_pm.C_Chr_02.0001000063)   | <i>OtNADK2</i>            | 874   | XP_003075197.1             | 1.1E-51               | Sub. IV   |
|              | <i>Ostreococcus lucimarinus</i>         | 35817 (e_gwEuk.2.225.1)                 | <i>OINADK1</i>            | 314   | XP_001416344.1             | 1.1E-54               | Sub. IV   |
|              |                                         | 43339 (e_gwEuk.14.189.1)                | <i>OINADK2</i>            | 313   | XP_001421435.1             | 9.1E-50               | Sub.II    |
|              | <i>Micromonas pusilla</i> RCC299        | 64658 (EuGene.1600010019)               | <i>MpNADK1</i> (RCC299)   | 988   | XP_002506643.1             | 2.7E-55               | Sub. II   |
|              |                                         | 67699 (gw2.05.171.1)                    | <i>MpNADK2</i> (RCC299)   | 311   | XP_002502052.1             | 3.2E-56               | Sub. IV   |
|              |                                         | 84626 (e_gw2.08.331.1)                  | <i>MpNADK3</i> (RCC299)   | 309   | XP_002507922.1             | 5.3E-06               | Sub. III  |
|              | <i>Micromonas pusilla</i> CCMP1545      | 123035 (fgenes2_kg.3_#_166_#_4275591:1) | <i>MpNADK1</i> (CCMP1545) | 393   | XP_003057482.1             | 3.2E-59               | Sub. IV   |
|              |                                         | 60995 (MicpuC2.EuGene.0000090546)       | <i>MpNADK2</i> (CCMP1545) | 836   | XP_003061343.1             | 5.5E-50               | Sub. II   |
|              | <i>Chlorella variabilis</i> NC64A       | 136701 (IGS.gm_17_00105)                | <i>CvNADK1</i> (NC64A)    | 445   | EFN53556.1                 | 2.8E-51               | Sub. IV   |
|              |                                         | 143672 (IGS.gm_6_00246)                 | <i>CvNADK2</i> (NC64A)    | 499   | EFN57008.1                 | 2.7E-37               | Sub. II   |
|              | <i>Coccomyxa subellipsoidea</i> C-169   | 49005 (estExt_fgenes1_pg.C_200064)      | <i>CsNADK1</i> (C-169)    | 342   | EIE19085.1                 | 6.6E-56               | Sub. IV   |
|              |                                         | 63074 (Genemark1.3857_g)                | <i>CsNADK2</i> (C-169)    | 409   | EIE23545.1                 | 1.1E-59               | Sub. II   |
|              | <i>Chlamydomonas reinhardtii</i>        | Cre07.g322950.t1.2                      | <i>CrNADK1</i>            | 486   | XP_001700866.1             | 1.2E-44               | Sub. II   |
|              |                                         | Cre10.g431650.t1.2                      | <i>CrNADK2</i>            | 391   | XP_001702496.1             | 4.9E-59               | Sub. IV   |
|              |                                         | Cre12.g560600.t1.3                      | <i>CrNADK3</i>            | 355   | XP_001703150.1             | 1.7E-39               | Sub. I    |
|              | <i>Volvox carteri</i>                   | Vocar20000710m                          | <i>VcNADK1</i>            | 629   | XP_002950024.1             | 1.1E-59               | Sub. IV   |
|              |                                         | Vocar20012749m                          | <i>VcNADK2</i>            | 454   | XP_002955100.1             | 1.2E-44               | Sub. II   |
|              |                                         | Vocar20008225m                          | <i>VcNADK3</i>            | 354   | XP_002949486.1             | 1.8E-33               | Sub. I    |

**Table S1.** The NADK family genes in plants (Cont.)

| Lineages    | Species*                          | Locus Name / ID <sup>&amp;</sup> | Nomenclature   | A. A. | Accession No. <sup>#</sup> | E value <sup>\$</sup> | Subfamily |
|-------------|-----------------------------------|----------------------------------|----------------|-------|----------------------------|-----------------------|-----------|
| Bryophytes  | <i>Physcomitrella patens</i>      | Pp1s17_312V6.1                   | <i>PpNADK1</i> | 867   | XP_001755443.1             | 5.9E-54               | Sub. II   |
|             |                                   | Pp1s32_187V6.1                   | <i>PpNADK2</i> | 582   | XP_001758345.1             | 1.2E-56               | Sub. I    |
|             |                                   | Pp1s57_138V6.1                   | <i>PpNADK3</i> | 536   | XP_001762814.1             | 1.2E-57               | Sub. I    |
|             |                                   | Pp1s77_287V6.1                   | <i>PpNADK4</i> | 589   | XP_001765616.1             | 3.0E-61               | Sub. I    |
|             |                                   | Pp1s69_47V6.1                    | <i>PpNADK5</i> | 322   | XP_001764605.1             | 3.3E-07               | Sub. III  |
| Lycophytes  | <i>Selaginella moellendorffii</i> | 50862 (gw1.47.338.1)             | <i>SmNADK1</i> | 714   | XP_002981035.1             | 5.1E-58               | Sub. II   |
|             |                                   | 76799 (e_gw1.1.1339.1)           | <i>SmNADK2</i> | 378   | XP_002962223.1             | 7.7E-58               | Sub. I    |
|             |                                   | 80525 (e_gw1.3.675.1)            | <i>SmNADK3</i> | 345   | XP_002963632.1             | 1.2E-61               | Sub. I    |
|             |                                   | 107884 (e_gw1.35.564.1)          | <i>SmNADK4</i> | 312   | XP_002977859.1             | 9.8E-06               | Sub. III  |
| Gymnosperms | <i>Picea sitchensis</i>           | NA                               | NA             | NA    | NA                         | NA                    | NA        |
| Eudicots    | <i>Arabidopsis thaliana</i>       | AT3G21070.1                      | <i>AtNADK1</i> | 530   | NP_974347.1                | 1.5E-52               | Sub. I    |
|             |                                   | AT1G21640.2                      | <i>AtNADK2</i> | 999   | NP_001185057.1             | 5.1E-59               | Sub. II   |
|             |                                   | AT1G78590.1                      | <i>AtNADK3</i> | 317   | NP_177980.2                | 2.6E-06               | Sub. III  |
|             | <i>Populus trichocarpa</i>        | Ptri.001G256100.1                | <i>PtNADK1</i> | 546   | XP_002298393.1             | 7.9E-53               | Sub. I    |
|             |                                   | Ptri.002G078700.1                | <i>PtNADK2</i> | 963   | XP_002302220.1             | 2.4E-58               | Sub. II   |
|             |                                   | Ptri.005G182600.1                | <i>PtNADK3</i> | 938   | XP_002306654.1             | 2.5E-58               | Sub. II   |
|             |                                   | Ptri.009G051500.1                | <i>PtNADK4</i> | 532   | XP_002314082.1             | 1.2E-53               | Sub. I    |
|             |                                   | Ptri.011G104400.1                | <i>PtNADK5</i> | 309   | XP_002331318.1             | 2.4E-06               | Sub. III  |
|             | <i>Cucumis sativus</i>            | Cucsa.143470.1                   | <i>CsNADK1</i> | 521   | XP_004139039.1             | 9.9E-50               | Sub. I    |
|             |                                   | Cucsa.328150.1                   | <i>CsNADK2</i> | 984   | XP_004149440.1             | 2.6E-57               | Sub. II   |
|             |                                   | Cucsa.273630.1                   | <i>CsNADK3</i> | 326   | XP_004137227.1             | 1.5E-06               | Sub. III  |
|             | <i>Brassica rapa</i>              | Bra001810                        | <i>BrNADK1</i> | 542   | NA                         | 1.3E-56               | Sub. I    |
|             |                                   | Bra017934                        | <i>BrNADK2</i> | 970   | NA                         | 2.7E-57               | Sub. II   |
|             |                                   | Bra023907                        | <i>BrNADK3</i> | 523   | NA                         | 3.9E-56               | Sub. I    |
|             |                                   | Bra031248                        | <i>BrNADK4</i> | 523   | NA                         | 1.9E-54               | Sub. I    |
| Bra008370   |                                   | <i>BrNADK5</i>                   | 317            | NA    | 1.8E-05                    | Sub. III              |           |
| Bra035050   |                                   | <i>BrNADK6</i>                   | 317            | NA    | 1.6E-06                    | Sub. III              |           |

**Table S1.** The NADK family genes in plants (Cont.)

| Lineages        | Species*                       | Locus Name / ID <sup>&amp;</sup> | Nomenclature   | A. A.          | Accession No. <sup>#</sup> | E value <sup>\$</sup> | Subfamily |
|-----------------|--------------------------------|----------------------------------|----------------|----------------|----------------------------|-----------------------|-----------|
| Eudicots        | <i>Vitis vinifera</i>          | GSVIVT01008810001                | <i>VvNADK1</i> | 846            | XP_002284607.2             | 5.3E-56               | Sub. II   |
|                 |                                | GSVIVT01025236001                | <i>VvNADK2</i> | 563            | XP_002285357.1             | 3.9E-50               | Sub. I    |
|                 |                                | GSVIVT01014095001                | <i>VvNADK3</i> | 315            | XP_002283669.1             | 4.2E-07               | Sub. III  |
| Monocots        | <i>Brachypodium distachyon</i> | Bradi2g26930.1                   | <i>BdNADK1</i> | 548            | XP_003568558.1             | 2.0E-60               | Sub. I    |
|                 |                                | Bradi2g61240.1                   | <i>BdNADK2</i> | 531            | XP_003567496.1             | 5.0E-59               | Sub. I    |
|                 |                                | Bradi4g23450.1                   | <i>BdNADK3</i> | 973            | XP_003577753.1             | 1.0E-55               | Sub. II   |
|                 |                                | Bradi4g28380.1                   | <i>BdNADK4</i> | 327            | XP_003576439.1             | 1.0E-06               | Sub. III  |
|                 | <i>Oryza sativa</i>            | LOC_Os01g72690.1                 | <i>OsNADK1</i> | 571            | NP_001045444.2             | 1.0E-58               | Sub. I    |
|                 |                                | LOC_Os05g32210.1                 | <i>OsNADK2</i> | 494            | EEC79147.1                 | 2.3E-62               | Sub. I    |
|                 |                                | LOC_Os11g08670.1                 | <i>OsNADK3</i> | 981            | NP_001067415.1             | 6.9E-56               | Sub. II   |
|                 |                                | LOC_Os09g17680.1                 | <i>OsNADK4</i> | 325            | NP_001062937.1             | 7.2E-07               | Sub. III  |
|                 | <i>Setaria italica</i>         | Si000598m                        | <i>SiNADK1</i> | 656            | XP_004971313.1             | 1.3E-60               | Sub. I    |
|                 |                                | Si021731m                        | <i>SiNADK2</i> | 529            | XP_004962206.1             | 2.3E-58               | Sub. I    |
|                 |                                | Si025905m                        | <i>SiNADK3</i> | 979            | XP_004978897.1             | 2.9E-57               | Sub. II   |
|                 |                                | Si030683m                        | <i>SiNADK4</i> | 294            | XP_004956632.1             | 6.3E-05               | Sub. III  |
|                 | <i>Sorghum bicolor</i>         | Sb03g046360.1                    | <i>SbNADK1</i> | 462            | XP_002459132.1             | 5.8E-61               | Sub. I    |
|                 |                                | Sb05g005750.1                    | <i>SbNADK2</i> | 976            | XP_002449145.1             | 1.7E-53               | Sub. II   |
|                 |                                | Sb09g019130.1                    | <i>SbNADK3</i> | 498            | XP_002439730.1             | 1.7E-53               | Sub. I    |
|                 |                                | Sb02g022560.1                    | <i>SbNADK4</i> | 330            | XP_002462255.1             | 7.4E-06               | Sub. III  |
| <i>Zea mays</i> | GRMZM2G046498_T02              | <i>ZmNADK1</i>                   | 975            | DAA38923.1     | 2.5E-51                    | Sub. II               |           |
|                 | GRMZM2G059073_T02              | <i>ZmNADK2</i>                   | 569            | NP_001147993.1 | 2.4E-58                    | Sub. I                |           |
|                 | GRMZM2G138342_T01              | <i>ZmNADK3</i>                   | 565            | NP_001151954.1 | 1.2E-60                    | Sub. I                |           |
|                 | GRMZM2G006678_T01              | <i>ZmNADK4</i>                   | 331            | ACF81218.1     | 8.6E-06                    | Sub. III              |           |

\*, The genome data of above species are available, except for *Picea sitchensis* and *Galdieria sulphuraria*, and downloaded from the public database. The data sources of each species are following:

Bacteria: *Escherichia coli* K-12 (EcoGene v3.0, <http://www.ecogene.org/>)

Cyanobactes: *Acaryochloris marina* MBIC11017 (JGI, [http://genome.jgi-psf.org/Acama\\_641228474/Acama\\_641228474.info.html](http://genome.jgi-psf.org/Acama_641228474/Acama_641228474.info.html))

*Prochlorococcus marinus* MIT 9301 (JGI, [http://genome.jgi-psf.org/Proma\\_640069322/Proma\\_640069322.info.html](http://genome.jgi-psf.org/Proma_640069322/Proma_640069322.info.html))

Glaucohytes: *Cyanophora paradoxa* (<http://cyanophora.rutgers.edu/cyanophora/home.php>)

Rhodophytes: *Cyanidioschyzon merolae* (<http://merolae.biol.s.u-tokyo.ac.jp/download/>)  
*Galdieria sulphuraria* (<http://genomics.msu.edu/galdieria/>)

Chlorophytes: *Ostreococcus tauri* (JGI v2.0, <http://genome.jgi-psf.org/Ostta4/Ostta4.home.html>)  
*Ostreococcus lucimarinus* (JGI v2.0, [http://genome.jgi-psf.org/Ost9901\\_3/Ost9901\\_3.home.html](http://genome.jgi-psf.org/Ost9901_3/Ost9901_3.home.html))  
*Micromonas pusilla* RCC299 (JGI v3.0, <http://genome.jgi-psf.org/MicpuN3/MicpuN3.home.html>)  
*Micromonas pusilla* CCMP1545 (JGI v3.0, <http://genome.jgi-psf.org/MicpuC3/MicpuC3.home.html>)  
*Chlorella variabilis* NC64A (JGI v1.0, [http://genome.jgi-psf.org/ChlNC64A\\_1/ChlNC64A\\_1.home.html](http://genome.jgi-psf.org/ChlNC64A_1/ChlNC64A_1.home.html))  
*Coccomyxa subellipsoidea* C-169 (JGI v2.0, [http://genome.jgi-psf.org/Coc\\_C169\\_1/Coc\\_C169\\_1.home.html](http://genome.jgi-psf.org/Coc_C169_1/Coc_C169_1.home.html))  
*Chlamydomonas reinhardtii* (JGI v4.0, <http://genome.jgi-psf.org/Chlre4/Chlre4.info.html>)  
*Volvox carteri* (JGI v2.0, <http://genome.jgi-psf.org/Volca1/Volca1.info.html>)

Bryophytes: *Physcomitrella patens* (JGI v3.0, [http://genome.jgi-psf.org/Phypa1\\_1/Phypa1\\_1.home.html](http://genome.jgi-psf.org/Phypa1_1/Phypa1_1.home.html))

Lycophytes: *Selaginella moellendorffii* (JGI v1.1, <http://genome.jgi-psf.org/Selmo1/Selmo1.home.html>)

Gymnosperms: *Picea sitchensis* (NCBI, <http://www.ncbi.nlm.nih.gov/>)

Monocots: *Sorghum bicolor* (JGI v2.1, <http://genome.jgi-psf.org/Sorbi1/Sorbi1.home.html>)  
*Oryza sativa* (RGAP v7.0, <http://rice.plantbiology.msu.edu/index.shtml>)  
*Zea mays* (MaizeSequence v5.6, <http://www.maizesequence.org/index.html>)  
*Brachypodium distachyon* (JGI v1.2, <http://www.phytozome.net/brachy.php>)  
*Setaria italica* (JGI v2.1, <http://www.phytozome.net/foxtailmillet.php>)

Eudicots: *Arabidopsis thaliana* (TAIR v10.0, <http://www.arabidopsis.org/>)  
*Populus trichocarpa* (JGI v2.2, [http://genome.jgi-psf.org/Poptr1\\_1/Poptr2\\_2.home.html](http://genome.jgi-psf.org/Poptr1_1/Poptr2_2.home.html))  
*Vitis vinifera* (GenoScope v1.0, <http://www.genoscope.cns.fr/externe/GenomeBrowser/Vitis/>)  
*Cucumis sativus* (JGI v1.0, <http://www.phytozome.net/cucumber.php>)  
*Brassica rapa* (BRAD v1.5, <http://brassicadb.org/brad/>)

<sup>&</sup>, The original Locus Name or IDs are annotated in the database of each species.

<sup>#</sup>, The corresponding Accession No. of each NADK is annotated in NCBI, and NA is not available.

<sup>\$</sup>, The E value of each NADK in hmmsearch by HMMER v3.0.
