# Supplementary material for: Genome-Wide Analysis of the NADK Gene Family in Plants
Source: PubMed Central journal article supplement (PMC4072752; doi:10.1371/journal.pone.0101051), 2014-06-26
Supplement: pone.0101051.s009.pdf [file pone.0101051.s009.pdf]

**Table S2** The *cis*-elements analysis of *AtNADKs* and *OsNADKs* promoters\*

| <i>cis</i> -elements                              | Core sequences | Experiments <sup>#</sup> | Functions of the <i>cis</i> -elements                                    | <i>OsNADK1</i> | <i>OsNADK2</i> | <i>OsNADK3</i> | <i>OsNADK4</i>        | <i>AtNADK1</i> | <i>AtNADK2</i> | <i>AtNADK3</i> |
|---------------------------------------------------|----------------|--------------------------|--------------------------------------------------------------------------|----------------|----------------|----------------|-----------------------|----------------|----------------|----------------|
| <b>Abiotic- / biotic-stress response elements</b> |                |                          |                                                                          |                |                |                |                       |                |                |                |
| LTR                                               | CCGAAA         | Yes                      | <i>cis</i> -acting element involved in low-temperature responsiveness    |                | +1285          |                | +581                  |                |                |                |
| HSE                                               | AAAAAATTC      | No                       | <i>cis</i> -acting element involved in heat stress responsiveness        | +1148          | -1287          | +1350          | +553                  | -1208          |                | -456           |
| MBS                                               | TAACTG         | Yes                      | MYB binding site involved in drought-inducibility                        | +357, +1120    | -457, -1259    | +319, +903     | -944                  |                |                | +1375          |
| ARE                                               | TGGTTT         | Yes                      | <i>cis</i> -acting element essential for the anaerobic induction         | -721, -890     | +258           | +13            | +660                  | +279           | +987           | -808           |
| TC-rich repeats                                   | ATTCTCTAAC     | No                       | <i>cis</i> -acting element involved in defense and stress responsiveness |                | +1412          | -506           |                       |                | +508, +1384    | -173           |
| W box                                             | TTGACC         | Yes                      | elicitation; wounding and pathogen responsiveness                        |                |                | +188, +1237    |                       | +60            |                |                |
| Box S                                             | AGCCACC        | No                       | elicitation; wounding and pathogen responsiveness                        | +433           |                |                |                       |                |                |                |
| GCC box                                           | AGCCGCC        | Yes                      | elicitation; wounding and pathogen responsiveness                        |                |                |                | -1005                 |                |                |                |
| EIRE                                              | TTCGACC        | Yes                      | elicitor-responsive element                                              |                |                |                |                       |                | +46            |                |
| Box-W1                                            | TTGACC         | Yes                      | fungal elicitor responsive element                                       |                |                | +188,+1237     |                       | +60            |                | -9, -834       |
| <b>Hormone response elements</b>                  |                |                          |                                                                          |                |                |                |                       |                |                |                |
| AuxRR-core                                        | GGTCCAT        | Yes                      | <i>cis</i> -acting element involved in auxin responsiveness              |                |                | +945           |                       |                |                |                |
| TGA-element                                       | AACGAC         | No                       | auxin-responsive element                                                 |                |                |                |                       | -134           | +829           |                |
| GARE-motif                                        | AAACAGA        | No                       | gibberellin-responsive element                                           |                | -1294          |                |                       | +183           |                |                |
| ABRE                                              | CACGTG         | Yes                      | <i>cis</i> -acting element involved in abscisic acid responsiveness      | +1367, +1328   | +1020          | -513           | +125,+1289,+435,+1342 | +295           | +893           | +812           |
| ERE                                               | ATTTCAAA       | Yes                      | ethylene-responsive element                                              | +1153          | +642, +1374    | +1344          |                       | +53            |                |                |
| TCA-element                                       | GAGAAGAATA     | No                       | <i>cis</i> -acting element involved in salicylic acid responsiveness     |                |                |                |                       | +555           |                | +1151          |
| CGTCA-motif                                       | CGTCA          | Yes                      | <i>cis</i> -acting element involved in MeJA-responsiveness               | +62, +1373     |                |                | +977, +1399           | +310           | +289           | +156, +539     |

\*, the *cis*-elements were scanned and identified by PlantCARE program (<http://bioinformatics.psb.ugent.be/webtools/plantcare/html/>) with the 1500 bp upstream from the transcription start site of each NADK gene. The numbers mean the positions of *cis*-elements at the promoter region, while the “+” and “-” stand for the positive and negative strands of the promoter sequences, respectively.

<sup>#</sup>, “Yes” means the *cis*-elements were identified on the basis of experimental evidence, while “No” means the *cis*-elements were putative and without relevant experimental evidence.
