# Supplementary material for: Genome-Wide Analysis of the NADK Gene Family in Plants
Source: PubMed Central journal article supplement (PMC4072752; doi:10.1371/journal.pone.0101051), 2014-06-26
Supplement: pone.0101051.s010.pdf [file pone.0101051.s010.pdf]

**Table S3** The EST profiles of NADK family genes in Arabidopsis

| Pool Name                | Total ESTs   | ESTs of                                                                                                                                                                                                                      |                                                                                                                                                                                                                                                                                                                                              |                                                                                                                                                                                                                                                          |
|--------------------------|--------------|------------------------------------------------------------------------------------------------------------------------------------------------------------------------------------------------------------------------------|----------------------------------------------------------------------------------------------------------------------------------------------------------------------------------------------------------------------------------------------------------------------------------------------------------------------------------------------|----------------------------------------------------------------------------------------------------------------------------------------------------------------------------------------------------------------------------------------------------------|
|                          |              | <i>AtNADK1</i>                                                                                                                                                                                                               | <i>AtNADK2</i>                                                                                                                                                                                                                                                                                                                               | <i>AtNADK3</i>                                                                                                                                                                                                                                           |
| <b>Root</b>              | <b>49512</b> | AV547501.1                                                                                                                                                                                                                   | AV547169.1                                                                                                                                                                                                                                                                                                                                   | AU226146.1<br>AU235446.1                                                                                                                                                                                                                                 |
| <b>Leaf</b>              | <b>12182</b> |                                                                                                                                                                                                                              | BU636024.1<br>BU636736.1<br>CA781695.1                                                                                                                                                                                                                                                                                                       |                                                                                                                                                                                                                                                          |
| <b>Vegetative tissue</b> | <b>2284</b>  | BX835447.1<br>BX839123.1                                                                                                                                                                                                     |                                                                                                                                                                                                                                                                                                                                              |                                                                                                                                                                                                                                                          |
| <b>Flower</b>            | <b>62048</b> |                                                                                                                                                                                                                              | ES108282.1                                                                                                                                                                                                                                                                                                                                   | ES164751.1                                                                                                                                                                                                                                               |
| <b>Silique</b>           | <b>13014</b> |                                                                                                                                                                                                                              |                                                                                                                                                                                                                                                                                                                                              | AV561000.1<br>AV566968.1<br>AV567142.1                                                                                                                                                                                                                   |
| <b>Seed</b>              | <b>16148</b> |                                                                                                                                                                                                                              | W43879.1                                                                                                                                                                                                                                                                                                                                     | BE524882.1                                                                                                                                                                                                                                               |
| <b>Other*</b>            |              | BP809334.1<br>BP832932.2<br>BP838976.1<br>BX836754.1<br>BX841206.1<br>DR255307.1<br>DR255308.1<br>DR255309.1<br>DR255310.1<br>DR255311.1<br>DR383743.1<br>EG510810.1<br>EG510811.1<br>EH860137.1<br>EL132995.1<br>EL190363.1 | BP640307.1<br>BP821410.1<br>BX835190.1<br>BX838630.1<br>EH823802.1<br>EH871622.1<br>EH881615.1<br>EH922734.1<br>EH968762.1<br>EH991931.1<br>EL047134.1<br>EL122691.1<br>EL215449.1<br>AV799512.1<br>AV807413.1<br>AV813431.1<br>AV815254.1<br>AV822694.1<br>AV827816.1<br>BP562439.1<br>BP606150.1<br>BP617317.1<br>BP617652.1<br>BP862508.1 | AV526752.1<br>BX837889.1<br>DR369581.1<br>DR369582.1<br>DR369583.1<br>DR369584.1<br>DR369585.1<br>DR369586.1<br>DR369587.1<br>DR369588.1<br>DR369589.1<br>DR384099.1<br>EL155433.1<br>EL327406.1<br>BP795858.1<br>BP613860.1<br>BP858918.1<br>BP866494.1 |
| <b>Total</b>             |              | 19                                                                                                                                                                                                                           | 30                                                                                                                                                                                                                                                                                                                                           | 25                                                                                                                                                                                                                                                       |

\*, The cDNA library (EST pool) was not constructed by a single tissue, but by the mixed or whole plant or unspecified tissue, and the ESTs of which were excluded in the analysis of EST profiles (Figure 5A).
