# Supplementary material for: Genome-Wide Analysis of the NADK Gene Family in Plants
Source: PubMed Central journal article supplement (PMC4072752; doi:10.1371/journal.pone.0101051), 2014-06-26
Supplement: pone.0101051.s011.pdf [file pone.0101051.s011.pdf]

**Table S4** The EST profiles of NADK family genes in rice

| Pool Name     | Total ESTs    | ESTs of        |                |                |                |            |  |
|---------------|---------------|----------------|----------------|----------------|----------------|------------|--|
|               |               | <i>OsNADK1</i> | <i>OsNADK2</i> | <i>OsNADK3</i> | <i>OsNADK4</i> |            |  |
| <b>Callus</b> | <b>162069</b> | CI309114.1     | CF322589.1     | CI369244.1     | BP185052.1     |            |  |
|               |               | CI067920.1     | CI378330.1     | CI371157.1     | CF320309.1     |            |  |
|               |               | CI310141.1     | CF330661.1     | CI386010.1     | CF323256.1     |            |  |
|               |               | CI071661.1     | CF330662.1     | CI607792.1     | CI374620.1     |            |  |
|               |               | CI078840.1     |                |                |                |            |  |
|               |               | CI081084.1     |                |                |                |            |  |
|               |               | CI083780.1     |                |                |                |            |  |
|               |               | AU100967.1     |                |                |                |            |  |
|               |               | C28575.1       |                |                |                |            |  |
|               |               | CF306707.1     |                |                |                |            |  |
|               |               | CF322444.1     |                |                |                |            |  |
|               |               | CF322737.1     |                |                |                |            |  |
|               |               | CI605789.1     |                |                |                |            |  |
|               |               | CI375206.1     |                |                |                |            |  |
|               |               | CI612152.1     |                |                |                |            |  |
|               |               | CI378715.1     |                |                |                |            |  |
|               |               | CI615150.1     |                |                |                |            |  |
|               |               | CI381140.1     |                |                |                |            |  |
|               |               | CI616362.1     |                |                |                |            |  |
|               |               | CI384318.1     |                |                |                |            |  |
|               |               | CI385295.1     |                |                |                |            |  |
|               |               | CI619349.1     |                |                |                |            |  |
|               |               | CI387387.1     |                |                |                |            |  |
|               |               | CI621064.1     |                |                |                |            |  |
|               |               | CI388476.1     |                |                |                |            |  |
|               |               | CI621752.1     |                |                |                |            |  |
|               |               | CI622304.1     |                |                |                |            |  |
|               |               | CI390522.1     |                |                |                |            |  |
|               |               | CI623608.1     |                |                |                |            |  |
|               |               | <b>Root</b>    | <b>67194</b>   | CA753682.1     | CI538761.1     | CI553381.1 |  |
|               |               |                |                | CI757906.1     | CI540594.1     |            |  |
|               |               |                |                | CI541204.1     | CI544776.1     |            |  |
| CI547747.1    | CA757976.1    |                |                |                |                |            |  |
| CI764339.1    |               |                |                |                |                |            |  |
| CI552904.1    |               |                |                |                |                |            |  |
| CI769209.1    |               |                |                |                |                |            |  |
| CI557176.1    |               |                |                |                |                |            |  |
| CI773193.1    |               |                |                |                |                |            |  |
| <b>Leaf</b>   |               |                |                | CB673330.1     | CI422742.1     | BI811834.1 |  |
|               |               | CB673331.1     | CI649510.1     | BI812492.1     |                |            |  |
|               |               | BM420996.1     | CF326325.1     | BI812533.1     |                |            |  |
|               |               | CF954946.1     | CB637120.1     | BM421122.1     |                |            |  |
|               |               |                | BM420922.1     | CB640927.1     |                |            |  |

**Table S4** The EST profiles of NADK family genes in rice (Cont.).

| Pool Name  | Total ESTs | ESTs of        |                |                |                |            |            |
|------------|------------|----------------|----------------|----------------|----------------|------------|------------|
|            |            | <i>OsNADK1</i> | <i>OsNADK2</i> | <i>OsNADK3</i> | <i>OsNADK4</i> |            |            |
| Leaf       | 175658     |                | CF952780.1     | CB640936.1     |                |            |            |
|            |            |                |                |                | CB641148.1     |            |            |
|            |            |                |                |                | CB641149.1     |            |            |
|            |            |                |                |                | CB668601.1     |            |            |
|            |            |                |                |                | CB668602.1     |            |            |
|            |            |                |                |                | CB672816.1     |            |            |
|            |            |                |                |                | CB672817.1     |            |            |
|            |            |                |                |                | CB621210.1     |            |            |
|            |            |                |                |                | CB621211.1     |            |            |
|            |            |                |                |                | CB631182.1     |            |            |
|            |            |                |                |                | CB631183.1     |            |            |
|            |            |                |                |                | CB631712.1     |            |            |
|            |            |                |                |                | CB631713.1     |            |            |
|            |            |                |                |                | CB631745.1     |            |            |
|            |            |                |                |                | CB631746.1     |            |            |
|            |            |                |                |                | CB634918.1     |            |            |
|            |            |                |                |                | CB634919.1     |            |            |
|            |            | Stem           | 124773         | CI290106.1     |                | CI000551.1 | CI294744.1 |
|            |            |                |                | CI011570.1     |                | CI002744.1 | CI582348.1 |
| CI315462.1 |            |                |                | CI003993.1     | CI025692.1     |            |            |
| CI565240.1 |            |                |                | CI285451.1     |                |            |            |
| CI315995.1 |            |                |                | CI312590.1     |                |            |            |
| CI318870.1 |            |                |                | CI313050.1     |                |            |            |
| CI567931.1 |            |                |                | CI313860.1     |                |            |            |
| CI320801.1 |            |                |                | CI314419.1     |                |            |            |
| CI324799.1 |            |                |                | CI314637.1     |                |            |            |
| CI574277.1 |            |                |                | CI314673.1     |                |            |            |
| CI326861.1 |            |                |                | CI315226.1     |                |            |            |
| CI576072.1 |            |                |                | CI315751.1     |                |            |            |
| CI338448.1 |            |                |                | CI316766.1     |                |            |            |
| CI584393.1 |            |                |                | CI318471.1     |                |            |            |
|            |            |                |                | CI319487.1     |                |            |            |
|            |            |                |                | CI319632.1     |                |            |            |
|            |            |                |                | CI320490.1     |                |            |            |
|            |            |                |                | CI325433.1     |                |            |            |
|            |            |                |                | CI329066.1     |                |            |            |
|            |            | CI330978.1     |                |                |                |            |            |
|            |            | CI331056.1     |                |                |                |            |            |
|            |            | CI331479.1     |                |                |                |            |            |
|            |            | CI331858.1     |                |                |                |            |            |
|            |            | CI332320.1     |                |                |                |            |            |
|            |            | CI336101.1     |                |                |                |            |            |
|            |            | CI338661.1     |                |                |                |            |            |

**Table S4** The EST profiles of NADK family genes in rice (Cont.).

| Pool Name      | Total ESTs    | ESTs of        |                |                |                |
|----------------|---------------|----------------|----------------|----------------|----------------|
|                |               | <i>OsNADK1</i> | <i>OsNADK2</i> | <i>OsNADK3</i> | <i>OsNADK4</i> |
| <b>Stem</b>    |               |                |                | CI564123.1     |                |
|                |               | CI339943.1     | CI345121.1     | CI339367.1     |                |
|                |               | CI348716.1     | CI356802.1     | CI347085.1     |                |
|                |               | CI592026.1     | CI597776.1     | CI354175.1     |                |
|                |               | CI349851.1     | CI597937.1     | CI518671.1     |                |
|                |               | CI595224.1     | CI363229.1     | CI522801.1     |                |
|                |               | CI354242.1     | CI364923.1     | CI526437.1     |                |
| <b>Flower</b>  | <b>134391</b> | CI357321.1     |                | CI527302.1     |                |
|                |               | CI598268.1     |                | CI529495.1     |                |
|                |               | CI360807.1     |                | CI531006.1     |                |
|                |               | CI517541.1     |                | CI535215.1     |                |
|                |               | CI735815.1     |                |                |                |
|                |               | CI523464.1     |                |                |                |
|                |               | CI741444.1     |                |                |                |
|                |               | CI106258.1     | EG709852.1     |                |                |
|                |               | CI112020.1     | CA762987.1     |                |                |
|                |               | CI112565.1     |                |                |                |
|                |               | CI113175.1     |                |                |                |
| <b>Panicle</b> | <b>136249</b> | CK044828.1     |                |                |                |
|                |               | CK055927.1     |                |                |                |
|                |               | CK061719.1     |                |                |                |
|                |               | CK063004.1     |                |                |                |
|                |               | CI736601.1     | CI520833.1     |                |                |
| <b>Seed</b>    | <b>32409</b>  | CI518864.1     | CI396842.1     |                |                |
|                |               | CI737067.1     |                |                |                |
|                |               | CI118744.1     | CI744756.1     | CI273468.1     | CT858530.1     |
|                |               | CI223352.1     | CR287023.1     | EX449817.1     | EX451307.1     |
|                |               | CI248486.1     | CX106324.1     | EX449818.1     | CX104330.1     |
| <b>Other*</b>  |               | CT859916.1     | CX110024.1     | CI472611.1     |                |
|                |               | BX899993.1     | CI258913.1     | CX118627.1     |                |
|                |               | FG952358.1     | CI225558.1     |                |                |
| <b>Total</b>   |               | 86             | 30             | 70             | 10             |

\*, The cDNA library (EST pool) was not constructed by a single tissue, but by the mixed or whole plant or unspecified tissue, and the ESTs of which were excluded in the analysis of EST profiles (**Figure 5B**).
