# Supplementary material for: Genome-Wide Analysis of the NADK Gene Family in Plants
Source: PubMed Central journal article supplement (PMC4072752; doi:10.1371/journal.pone.0101051), 2014-06-26
Supplement: pone.0101051.s012.pdf [file pone.0101051.s012.pdf]

**Table S5** The gene-specific primers used for qRT-PCR in this study

| Gene Name                                  | Primer Sequences                                                     | Amplicon Length | Span Introns |
|--------------------------------------------|----------------------------------------------------------------------|-----------------|--------------|
| <i>AtNADK1</i>                             | F: 5'-TGCTACTGTGACAACATTCGT-3'<br>R: 5'-TTGAATGGCACTTGGACTCTC-3'     | 218 bp          | 10           |
| <i>AtNADK2</i>                             | F: 5'-GTTATGAGCACGACCGTCTTATC-3'<br>R: 5'-TGTGGGCAGATTGGAGTGAAC-3'   | 151 bp          | 5, 6         |
| <i>AtNADK3</i>                             | F: 5'-TCAATTCTGACCCAACACAAGC-3'<br>R: 5'-AGGAACCACTCTGCCAAACAA-3'    | 146 bp          | 2, 3         |
| <i>AtTub6</i><br>(AT5G12250)               | F: 5'-ATGTTGTACGCAAAGAGGCTG-3'<br>R: 5'-AAGTGTCGCATTGTATGGCTC-3'     | 209 bp          | 1            |
| <i>OsNADK1</i>                             | F: 5'-GATGGGACTGTTTTATGGGCT-3'<br>R: 5'-CATGGCACTGTAGACGGTTTC-3'     | 181 bp          | 7, 8         |
| <i>OsNADK2</i>                             | F: 5'-TGACTAAACCTAATTCCAACCTCCG-3'<br>R: 5'-ACAATGATGCTGCCATAAAAC-3' | 246 bp          | 5, 6         |
| <i>OsNADK3</i>                             | F: 5'-CCTTCCTGATTCTGCTCGTCTT-3'<br>R: 5'-CCTTGATAATTGCTGCCTCCTT-3'   | 100 bp          | 7            |
| <i>OsNADK4</i>                             | F: 5'-TGCGTGTATCCAATCCCAAG-3'<br>R: 5'-TAGCCCGTAGAAGAGTGCCAT-3'      | 201 bp          | 1            |
| <i>OsActin1</i><br>(accession ID KC140126) | F: 5'-GTGGTCGCCCTCCTGAAAG-3'<br>R: 5'-GGCTTAGCATTCTTGGGTCCG-3'       | 170 bp          | 3            |
